# Supplementary material for: Elemental sulfur as the “S” source: visible-light-mediated four-component reactions leading to thiocyanates
Source: Royal Society of Chemistry journal article supplement (doi:10.1039/d2qo00539e), 2022-01-01
Supplement: d2qo00539e1.pdf [file d2qo00539e1.pdf]

## Supplementary Information

### Elemental sulfur as the “S” source: visible-light-mediated four-component reactions leading to thiocyanates

Zhiwei Wang,<sup>a</sup> Ruisheng Liu<sup>a</sup>, Chengming Qu,<sup>a</sup> Yufen Lv<sup>\*a</sup>, Huilan Yue,<sup>\*b</sup> Wei Wei<sup>\*a,b</sup>

<sup>a</sup> School of Chemistry and Chemical Engineering, Qufu Normal University, Qufu 273165, Shandong, China

\*E-mail: weiweiqfnu@163.com; yufenlv06@163.com

<sup>b</sup> Qinghai Provincial Key Laboratory of Tibetan Medicine Research and CAS Key Laboratory of Tibetan Medicine Research, Northwest Institute of Plateau Biology, Qinghai, Xining 810008, China.

\*E-mail: hlyue@nwipb.cas.cn

#### Table of Content

|                                                                                                                                                                        |        |
|------------------------------------------------------------------------------------------------------------------------------------------------------------------------|--------|
| 1. General information .....                                                                                                                                           | S2     |
| 2. The procedure for visible-light-initiated four-component reaction of $\alpha$ -diazoesters, elemental sulfur, cyclic ethers and TMSCN leading to thiocyanates ..... | S2     |
| 3. The procedure for two-component reaction of $\alpha$ -diazoesters with dimethoxyethane leading to $\alpha$ -alkoxyl esters.....                                     | S3     |
| 3. Preliminary mechanistic studies. ....                                                                                                                               | S3-S5  |
| 4. Characterization data of products <b>5a-5x</b> , <b>6a-6e</b> .....                                                                                                 | S6-S14 |
| 5. Copies of NMR spectra for <b>5a-5x</b> , <b>6a-6e</b> .....                                                                                                         | S15-43 |

## 1. General information

All commercially available reagent grade chemicals were purchased from Aldrich, Acros, Bidepharm and Energy Chemical Company and used as received without further purification unless otherwise stated.  $^1\text{H}$  NMR and  $^{13}\text{C}$  NMR were recorded in  $\text{CDCl}_3$  on a Bruker Avance III spectrometer with TMS as internal standard (500 MHz  $^1\text{H}$ , 125 MHz  $^{13}\text{C}$ ) at room temperature, the chemical shifts ( $\delta$ ) were expressed in ppm and  $J$  values were given in Hz. The following abbreviations are used to indicate the multiplicity: singlet (s), doublet (d), triplet (t), quartet (q), doublet of doublets (dd), doublet of triplets (dt), and multiplet (m). All first order splitting patterns were assigned on the basis of the appearance of the multiplet. Splitting patterns that could not be easily interpreted were designated as multiplet (m). Mass analyses and HRMS were obtained on a Finnigan-LCQDECA mass spectrometer and a Bruker Daltonics Bio-TOF-Q mass spectrometer by the ESI method, respectively. Column chromatography was performed on silica gel (200-300 mesh). There is 3.0 cm distance between the reactor and LEDs.

## 2. The procedure for visible-light-initiated four-component reaction of $\alpha$ -diazoesters, elemental sulfur, cyclic ethers and TMSCN leading to thiocyanates.

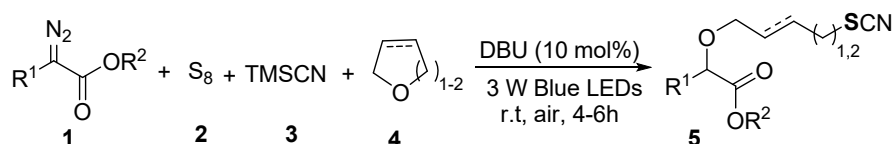

To a mixture of  $\alpha$ -diazoesters **1** (0.2 mmol),  $\text{S}_8$  **2** (0.2 mmol), TMSCN **3** (0.1 mmol) and DBU (0.01 mmol) was added cyclic ethers **4** (2 mL). The reaction mixture was stirred in air under the irradiation of 3W blue LED at room temperature for 4-6h. After completion of the reaction, the solution was concentrated in vacuum. The residue was purified by flash column chromatography using a mixture of petroleum ether and ethyl acetate as eluent to give the desired product **5**.

## 3. The procedure for two-component reaction of $\alpha$ -diazoesters with dimethoxyethane leading to $\alpha$ -alkoxyl esters.

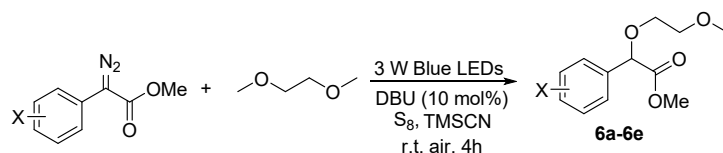

To a mixture of  $\alpha$ -diazoesters **1** (0.2 mmol),  $\text{S}_8$  (0.2 mmol), TMSCN (0.1 mmol) and DBU (0.01mmol) was added dimethoxyethane (2 mL). The reaction mixture was stirred in air under the irradiation of 3W blue LED at room temperature for 4h. After completion of the reaction, the solution was concentrated in vacuum. The residue was purified by flash column chromatography using a mixture of petroleum ether and ethyl acetate as eluent to give the desired product **6**.

#### 4. Preliminary mechanistic studies.

##### 4.1 The addition of TEMPO in the model reaction system.

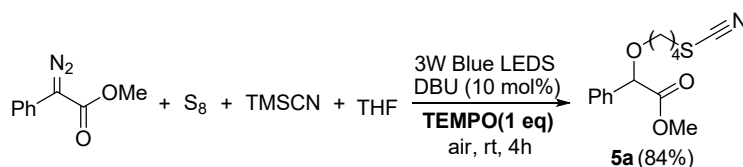

To a mixture of  $\alpha$ -diazoester **1a** (0.2 mmol),  $\text{S}_8$  **2** (0.2 mmol), TMSCN **3** (0.1 mmol) and DBU (0.01mmol), TEMPO (0.1 mmol) was added THF (AR, 2 mL). The reaction mixture was stirred in air under the irradiation of 3W blue LED at room temperature for 4h. After completion of the reaction, the solution was concentrated in vacuum, the desired product **5a** was obtained in 84% yield. This result indicated that a radical process might not be involved in the present transformations.

##### 4.3 Deuterium experiment.

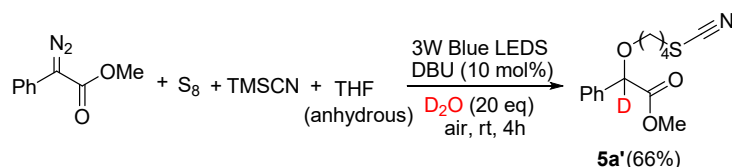

To a mixture of  $\alpha$ -diazoester **1a** (0.2 mmol),  $\text{S}_8$  **2** (0.2 mmol), TMSCN **3** (0.1 mmol), DBU (0.01mmol), and  $\text{D}_2\text{O}$  (2 mmol) was added anhydrous THF (2 mL). The

reaction mixture was stirred in air under the irradiation of 3W blue LED at room temperature for 4h. After completion of the reaction, the solution was concentrated in vacuum, the desired product D-5a was obtained in 66% yield. The deuterated product was determined by  $^1\text{H}$  NMR and HRMS. This result indicated which indicated that proton at  $\alpha$ -position of ester came from water in solvent.

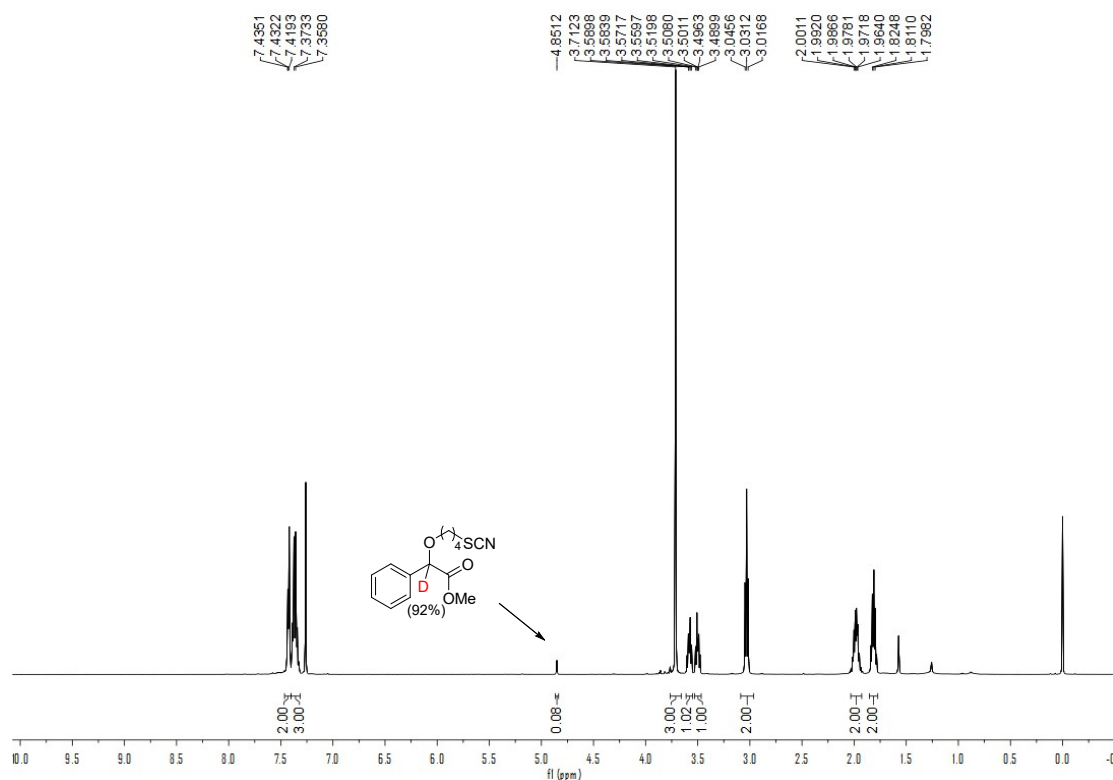

NMR

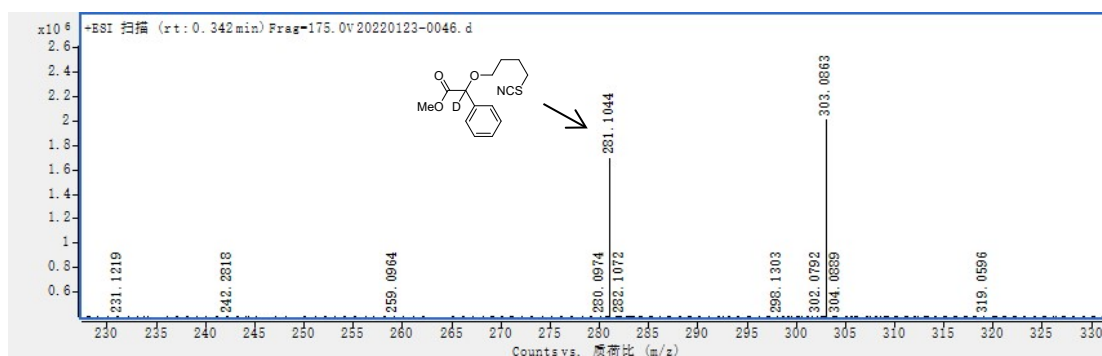

HRMS

#### 4.2 The procedures for Light On/off experiments.

To a mixture of  $\alpha$ -diazoester **1a** (0.4 mmol),  $S_8$  **2** (0.2 mmol), diethyl H-phosphonate **3a** (0.1 mmol), and DBU (0.1 mmol) was added THF (2 mL). The reaction mixture was separately stirred and irradiated by 3 W blue LEDs at room temperature for 1h, 2h, and 3h. The desired product **5a** was isolated in 25%, 50%, and 71%, respectively. Additionally, the reaction mixture was stirred and irradiated by 3 W Blue LEDs at room temperature for 1h, then the reaction mixture was continuously stirred in the dark for 1h, the corresponding product was also obtained in 25.1% yield. Additionally, when the reaction mixture was stirred and irradiated by 3 W blue LEDs at room temperature for 2h, then the reaction mixture was continuously stirred in the dark for 1h, the corresponding product was obtained in 50% yield. The above results suggested that the continuous visible-light irradiation is necessary for promoting this transformation.

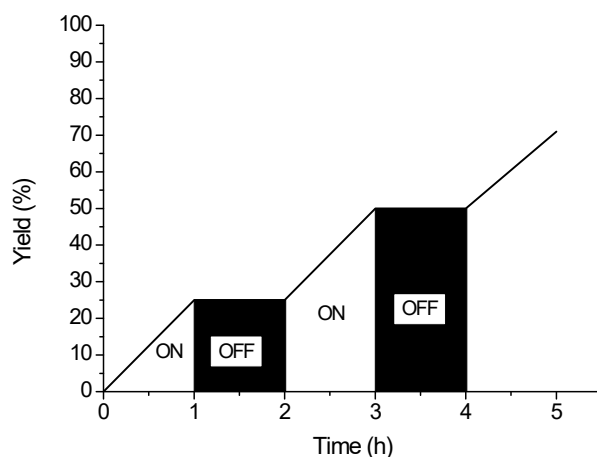

**Fig S1.** On/off experiments.

## 5. Characterization data of products 5a- 5x

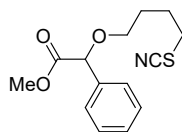

### methyl 2-phenyl-2-(4-thiocyanatobutoxy)acetate

Compound **5a** was obtained in 84% yield (23.4 mg) according to the general procedure (4h). Colorless oil.  $^1\text{H NMR}$  (500 MHz,  $\text{CDCl}_3$ )  $\delta$  7.43 – 7.42 (m, 2H), 7.39 – 7.32 (m, 3H), 4.85 (s, 1H), 3.71 (s, 3H), 3.60 – 3.56 (m, 1H), 3.52 – 3.48 (m, 1H), 3.03 (t,  $J = 7.2$  Hz, 2H), 1.99 – 1.96 (m, 2H), 1.83 – 1.78 (m, 2H);  $^{13}\text{C NMR}$  (125 MHz,  $\text{CDCl}_3$ )  $\delta$  171.2, 136.4, 128.8, 128.7, 127.2, 112.3, 81.1, 68.8, 52.3, 33.8, 27.7, 27.0; HRMS (ESI)  $m/z$ :  $[\text{M} + \text{H}]^+$  Calcd for  $\text{C}_{14}\text{H}_{18}\text{NO}_3\text{S}$  280.1007; found 280.1008.

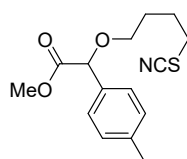

### methyl 2-(4-thiocyanatobutoxy)-2-(p-tolyl)acetate

Compound **5b** was obtained in 89% yield (26.2 mg) according to the general procedure (4h). Colorless oil.  $^1\text{H NMR}$  (500 MHz,  $\text{CDCl}_3$ )  $\delta$  7.30 (d,  $J = 8.1$  Hz, 2H), 7.18 (d,  $J = 7.9$  Hz, 2H), 4.81 (s, 1H), 3.70 (s, 3H), 3.56 – 3.53 (m, 1H), 3.50 – 3.46 (m, 1H), 3.02 (t,  $J = 7.2$  Hz, 2H), 2.35 (s, 3H), 1.99 – 1.94 (m, 2H), 1.80 (t,  $J = 6.7$  Hz, 2H);  $^{13}\text{C NMR}$  (125 MHz,  $\text{CDCl}_3$ )  $\delta$  171.4, 138.7, 133.4, 129.4, 129.3, 127.1, 112.3, 81.0, 68.6, 52.2, 33.9, 27.7, 27.0, 21.2; HRMS (ESI)  $m/z$ :  $[\text{M} + \text{H}]^+$  Calcd for  $\text{C}_{15}\text{H}_{20}\text{NO}_3\text{S}$  294.1164; found 294.1166.

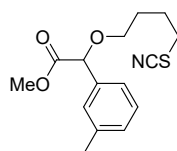

### methyl 2-(4-thiocyanatobutoxy)-2-(m-tolyl)acetate

Compound **5c** was obtained in 84% yield (24.5 mg) according to the general procedure (4h). Colorless oil.  $^1\text{H NMR}$  (500 MHz,  $\text{CDCl}_3$ )  $\delta$  7.27 – 7.20 (m, 3H), 7.15 (d,  $J = 7.4$  Hz, 1H), 4.81 (s, 1H), 3.71 (s, 3H), 3.57 – 3.54 (m, 1H), 3.51 – 3.48 (m, 1H), 3.03 (t,  $J = 7.2$  Hz, 2H), 2.36 (s, 3H), 1.99 – 1.94 (m, 2H), 1.83 – 1.77 (m, 2H);  $^{13}\text{C NMR}$  (125 MHz,  $\text{CDCl}_3$ )  $\delta$  171.3, 138.5, 136.2, 129.6, 128.6, 127.8, 124.3, 112.3, 81.2, 68.8, 52.3, 33.9, 27.7, 27.0, 21.4; HRMS (ESI)  $m/z$ :  $[\text{M} + \text{H}]^+$  Calcd for  $\text{C}_{15}\text{H}_{20}\text{NO}_3\text{S}$  294.1164; found 294.1168.

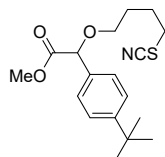

### methyl 2-(4-(tert-butyl)phenyl)-2-(4-thiocyanatobutoxy)acetate

Compound **5d** was obtained in 79% yield (26.3 mg) according to the general procedure (4h). Colorless oil.  $^1\text{H}$  NMR (500 MHz,  $\text{CDCl}_3$ )  $\delta$  7.38 (d,  $J = 8.4$  Hz, 2H), 7.32 (d,  $J = 8.4$  Hz, 2H), 4.83 (s, 1H), 3.71 (s, 3H), 3.57 – 3.54 (m, 1H), 3.52 – 3.49 (m, 1H), 3.03 (t,  $J = 7.2$  Hz, 2H), 1.99 – 1.96 (m, 2H), 1.83 – 1.79 (m, 2H), 1.31 (s, 9H);  $^{13}\text{C}$  NMR (125 MHz,  $\text{CDCl}_3$ )  $\delta$  171.4, 151.8, 133.3, 126.9, 125.7, 112.3, 81.0, 68.7, 52.2, 34.6, 33.9, 31.3, 27.8, 27.0; HRMS (ESI)  $m/z$ :  $[\text{M} + \text{H}]^+$  Calcd for  $\text{C}_{18}\text{H}_{26}\text{NO}_3\text{S}$  336.1633; found 336.1636.

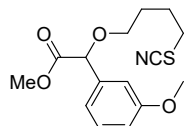

**methyl 2-(3-methoxyphenyl)-2-(4-thiocyanatobutoxy)acetate**

Compound **5e** was obtained in 70% yield (21.6 mg) according to the general procedure (6h). Colorless oil.  $^1\text{H}$  NMR (500 MHz,  $\text{CDCl}_3$ )  $\delta$  7.30 – 7.26 (m, 1H), 7.00 – 6.97 (m, 2H), 6.89 – 6.97 (m, 1H), 4.83 (d,  $J = 7.5$  Hz, 1H), 3.81 (d,  $J = 3.1$  Hz, 3H), 3.71 (s, 3H), 3.59 – 3.55 (m, 1H), 3.52 – 3.48 (m, 1H), 3.01 (t,  $J = 7.2$  Hz, 2H), 2.00 – 1.96 (m, 2H), 1.83 – 1.79 (m, 2H);  $^{13}\text{C}$  NMR (125 MHz,  $\text{CDCl}_3$ )  $\delta$  171.1, 159.9, 137.8, 129.7, 119.5, 114.5, 112.5, 112.3, 81.0, 68.8, 55.3, 52.3, 33.8, 27.7, 27.0; HRMS (ESI)  $m/z$ :  $[\text{M} + \text{H}]^+$  Calcd for  $\text{C}_{15}\text{H}_{20}\text{NO}_4\text{S}$  310.1113; found 310.1115.

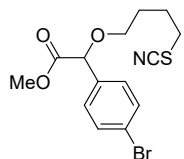

**methyl 2-(4-bromophenyl)-2-(4-thiocyanatobutoxy)acetate**

Compound **5f** was obtained in 80% yield (28.7 mg) according to the general procedure (6h). Colorless oil.  $^1\text{H}$  NMR (500 MHz,  $\text{CDCl}_3$ )  $\delta$  7.50 (d,  $J = 8.4$  Hz, 2H), 7.31 (d,  $J = 8.4$  Hz, 2H), 4.81 (s, 1H), 3.71 (s, 3H), 3.61 – 3.56 (m, 1H), 3.51 – 3.48 (m, 1H), 3.03 (t,  $J = 7.2$  Hz, 2H), 2.10 – 1.95 (m, 2H), 1.84 – 1.79 (m, 2H);  $^{13}\text{C}$  NMR (125 MHz,  $\text{CDCl}_3$ )  $\delta$  170.8, 135.4, 131.9, 128.8, 122.9, 112.2, 80.5, 69.0, 52.4, 33.8, 27.7, 27.0; HRMS (ESI)  $m/z$ :  $[\text{M} + \text{H}]^+$  Calcd for  $\text{C}_{14}\text{H}_{17}\text{BrNO}_3\text{S}$  358.0113; found 358.0117.

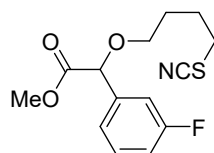

**methyl 2-(3-fluorophenyl)-2-(4-thiocyanatobutoxy)acetate**

Compound **5g** was obtained in 84% yield (25.3 mg) according to the general procedure (4h). Colorless oil.  $^1\text{H}$  NMR (500 MHz,  $\text{CDCl}_3$ )  $\delta$  7.36 – 7.32 (m, 1H), 7.21 (d,  $J = 7.7$  Hz, 1H), 7.16 (d,  $J = 9.4$  Hz, 1H), 7.06 – 7.15 (m, 1H), 4.85 (s, 1H), 3.73 (s, 3H), 3.61 – 3.58 (m, 1H), 3.53 – 3.50 (m, 1H), 3.04 (t,  $J = 7.2$  Hz, 2H), 2.01 – 1.97 (m, 2H), 1.85 – 1.81 (m, 2H);  $^{13}\text{C}$  NMR (125 MHz,  $\text{CDCl}_3$ )  $\delta$  170.8, 162.8 (d,  $J = 245.3$  Hz), 138.7 (d,  $J = 7.3$  Hz), 130.2 (d,  $J = 8.1$  Hz), 122.7 (d,  $J = 3.0$  Hz), 115.7 (d,  $J =$

21.0 Hz), 114.1(d,  $J = 22.5$  Hz), 112.3, 80.5 (d,  $J = 1.7$  Hz), 69.0, 52.4, 33.8, 27.7, 26.9; HRMS (ESI)  $m/z$ :  $[M + H]^+$  Calcd for  $C_{14}H_{17}FNO_3S$  298.0913; found 298.0910.

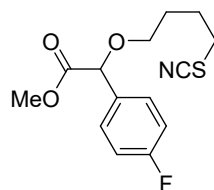

#### **methyl 2-(4-fluorophenyl)-2-(4-thiocyanatobutoxy)acetate**

Compound **5h** was obtained in 86% yield (25.6 mg) according to the general procedure (4h). Yellow oil.  $^1H$  NMR (500 MHz,  $CDCl_3$ )  $\delta$  7.42 – 7.40 (m, 2H), 7.07 – 7.04 (m, 2H), 4.83 (s, 1H), 3.72 (s, 3H), 3.60 – 3.56 (m, 1H), 3.51 – 3.47 (m, 1H), 3.03 (t,  $J = 7.2$  Hz, 2H), 2.00 – 1.96 (m, 2H), 1.84 – 1.78 (m, 2H);  $^{13}C$  NMR (125 MHz,  $CDCl_3$ )  $\delta$  171.1, 163.9 (d,  $J = 246.0$  Hz), 132.2 (d,  $J = 3.2$  Hz), 128.9 (d,  $J = 8.3$  Hz), 115.7(d,  $J = 22.5$  Hz), 112.3, 80.4, 68.9, 52.4, 33.8, 27.7, 26.9; HRMS (ESI)  $m/z$ :  $[M + H]^+$  Calcd for  $C_{14}H_{17}FNO_3S$  298.0913; found 298.0909.

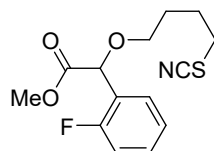

#### **methyl 2-(2-fluorophenyl)-2-(4-thiocyanatobutoxy)acetate**

Compound **5i** was obtained in 83% yield (24.6 mg) according to the general procedure (4h). Colorless oil.  $^1H$  NMR (500 MHz,  $CDCl_3$ )  $\delta$  7.45 – 7.42 (m, 1H), 7.35 – 7.32 (m, 1H), 7.18 (t,  $J = 7.3$  Hz, 1H), 7.08 (t,  $J = 9$  Hz, 1H), 5.20 (s, 1H), 3.73 (d,  $J = 2.6$  Hz, 3H), 3.65 – 3.62 (m, 1H), 3.53 – 3.50 (m, 1H), 3.02 (t,  $J = 7.2$  Hz, 2H), 1.99 – 1.93 (m, 2H), 1.83 – 1.77 (m, 2H);  $^{13}C$  NMR (125 MHz,  $CDCl_3$ )  $\delta$  170.7, 160.4 (d,  $J = 246.8$  Hz), 130.5 (d,  $J = 8.2$  Hz), 128.7 (d,  $J = 3.3$  Hz), 124.6 (d,  $J = 3.6$  Hz), 123.9 (d,  $J = 14.2$  Hz), 115.6 (d,  $J = 21.6$  Hz), 112.3, 74.1 (d,  $J = 3.0$  Hz), 69.6, 69.1, 52.4, 33.8, 27.7, 26.9; HRMS (ESI)  $m/z$ :  $[M + H]^+$  Calcd for  $C_{14}H_{17}FNO_3S$   $[M+H]^+$  298.0913, found 298.0898.

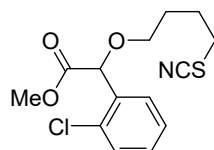

#### **methyl 2-(2-chlorophenyl)-2-(4-thiocyanatobutoxy)acetate**

Compound **5j** was obtained in 85% yield (26.4 mg) according to the general procedure (4h). Colorless oil.  $^1H$  NMR (500 MHz,  $CDCl_3$ )  $\delta$  7.49 – 7.46 (m, 1H), 7.41 – 7.39 (m, 1H), 7.32 – 7.28 (m, 2H), 5.34 (s, 1H), 3.73 (s, 3H), 3.67 – 3.63 (m, 1H), 3.54 – 3.50 (m, 1H), 3.02 (t,  $J = 7.2$  Hz, 2H), 1.98 – 1.94 (m, 2H), 1.82 – 1.79 (m, 2H);  $^{13}C$  NMR (125 MHz,  $CDCl_3$ )  $\delta$  170.7, 134.4, 133.9, 129.9, 129.7, 128.7, 127.3, 112.3, 69.2, 52.4, 33.8, 27.7, 26.9; HRMS (ESI)  $m/z$ :  $[M + H]^+$  Calcd for  $C_{14}H_{17}ClNO_3S$  314.0618; found 314.0614.



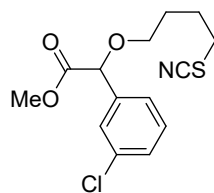

#### methyl 2-(3-chlorophenyl)-2-(4-thiocyanatobutoxy)acetate

Compound **5k** was obtained in 79% yield (34.1 mg) according to the general procedure (4h). Colorless oil.  $^1\text{H}$  NMR (500 MHz,  $\text{CDCl}_3$ )  $\delta$  7.43 (s, 1H), 7.34 – 7.30 (m, 3H), 4.82 (s, 1H), 3.73 (s, 3H), 3.60 – 3.58 (m, 1H), 3.52 – 3.48 (m, 1H), 3.04 (t,  $J = 7.2$  Hz, 2H), 2.01 – 1.95 (m, 2H), 1.85 – 1.80 (m, 2H);  $^{13}\text{C}$  NMR (125 MHz,  $\text{CDCl}_3$ )  $\delta$  170.7, 138.3, 134.6, 129.9, 128.9, 127.2, 125.2, 112.3, 80.4, 69.1, 52.5, 33.8, 27.7, 26.9; HRMS (ESI)  $m/z$ :  $[\text{M} + \text{H}]^+$  Calcd for  $\text{C}_{14}\text{H}_{17}\text{ClNO}_3\text{S}$  314.0618; found 314.0616.

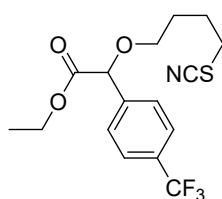

#### ethyl 2-(4-thiocyanatobutoxy)-2-(4-(trifluoromethyl)phenyl)acetate

Compound **5l** was obtained in 77% yield (27.7 mg) according to the general procedure (6h). Colorless oil.  $^1\text{H}$  NMR (500 MHz,  $\text{CDCl}_3$ )  $\delta$  7.64 – 7.57 (m, 4H), 4.89 (s, 1H), 4.23 – 4.13 (m, 2H), 3.65 – 3.63 (m, 1H), 3.55 – 3.51 (m, 1H), 3.05 (t,  $J = 7.2$  Hz, 2H), 2.02 – 1.97 (m, 2H), 1.86 – 1.81 (m, 2H), 1.23 (t,  $J = 7.1$  Hz, 3H);  $^{13}\text{C}$  NMR (125 MHz,  $\text{CDCl}_3$ )  $\delta$  170.1, 140.3, 130.8 (d,  $J = 32.3$  Hz), 127.2, 125.6 (q,  $J = 3.7$  Hz), 123.9 (d,  $J = 272.1$  Hz), 80.6, 69.2, 61.6, 33.8, 27.8, 26.9, 14.1; HRMS (ESI)  $m/z$ :  $[\text{M} + \text{H}]^+$  Calcd for  $\text{C}_{16}\text{H}_{19}\text{F}_3\text{NO}_3\text{S}$  362.1038; found 362.1042.

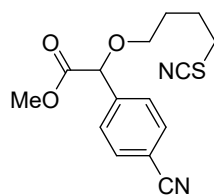

#### methyl 2-(4-cyanophenyl)-2-(4-thiocyanatobutoxy)acetate

Compound **5m** was obtained in 86% yield (25.1 mg) according to the general procedure (6h). Colorless oil.  $^1\text{H}$  NMR (500 MHz,  $\text{CDCl}_3$ )  $\delta$  7.67 (d,  $J = 8.1$  Hz, 2H), 7.57 (d,  $J = 8.0$  Hz, 2H), 4.91 (s, 1H), 3.73 (s, 3H), 3.67 – 3.63 (m, 1H), 3.55 – 3.50 (m, 1H), 3.04 (t,  $J = 7.2$  Hz, 2H), 2.02 – 1.99 (m, 2H), 1.87 – 1.83 (m, 2H);  $^{13}\text{C}$  NMR (125 MHz,  $\text{CDCl}_3$ )  $\delta$  170.2, 141.4, 132.5, 127.7, 118.4, 112.7, 112.2, 80.4, 69.4, 52.6, 33.7, 27.8, 26.9; HRMS (ESI)  $m/z$ :  $[\text{M} + \text{H}]^+$  Calcd for  $\text{C}_{15}\text{H}_{17}\text{N}_2\text{O}_3\text{S}$   $[\text{M} + \text{H}]^+$  305.0960, found 305.0955.

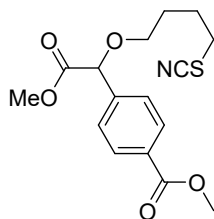

**methyl 4-(2-methoxy-2-oxo-1-(4-thiocyanatobutoxy)ethyl)benzoate**

Compound **5n** was obtained in 93% yield (31.6 mg) according to the general procedure (6h). Colorless oil. <sup>1</sup>H NMR (500 MHz, CDCl<sub>3</sub>) δ 7.97 (d, *J* = 8.3 Hz, 2H), 7.44 (d, *J* = 8.3 Hz, 2H), 4.84 (s, 1H), 3.85 (s, 3H), 3.65 (s, 3H), 3.57 – 3.53 (m, 1H), 3.46 – 3.42 (m, 1H), 2.97 (t, *J* = 7.2 Hz, 2H), 1.94 – 1.90 (m, 2H), 1.77 – 1.75 (m, 2H); <sup>13</sup>C NMR (125 MHz, CDCl<sub>3</sub>) δ 170.7, 166.6, 141.2, 130.5, 129.9, 127.0, 112.2, 80.7, 69.1, 52.5, 52.2, 33.8, 27.7, 27.0; HRMS (ESI) *m/z*: [M + H]<sup>+</sup> Calcd for C<sub>16</sub>H<sub>20</sub>NO<sub>5</sub>S [M+H]<sup>+</sup> 338.1062, found 338.1067.

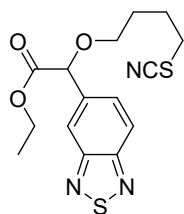

**ethyl 2-(benzo[c][1,2,5]thiadiazol-5-yl)-2-(4-thiocyanatobutoxy)acetate**

Compound **5o** was obtained in 52% yield (18.3 mg) according to the general procedure (6h). Yellow oil. <sup>1</sup>H NMR (500 MHz, CDCl<sub>3</sub>) δ 8.08 (s, 1H), 8.01 (d, *J* = 9.1 Hz, 1H), 7.72 – 7.70 (m, 1H), 5.01 (s, 1H), 4.24 – 4.18 (m, 2H), 3.70 – 3.67 (m, 1H), 3.61 – 3.58 (m, 1H), 3.07 (t, *J* = 7.2 Hz, 2H), 2.04 – 2.00 (m, 2H), 1.88 – 1.85 (m, 2H), 1.24 (t, *J* = 5.8 Hz, 3H); <sup>13</sup>C NMR (125 MHz, CDCl<sub>3</sub>) δ 169.9, 154.8, 154.6, 138.2, 128.2, 121.8, 120.0, 112.2, 80.8, 69.2, 61.7, 33.8, 27.8, 27.0, 14.1; HRMS (ESI) *m/z*: [M + H]<sup>+</sup> Calcd for C<sub>15</sub>H<sub>18</sub>N<sub>3</sub>O<sub>3</sub>S<sub>2</sub> [M+H]<sup>+</sup> 352.0790, found 352.0777.

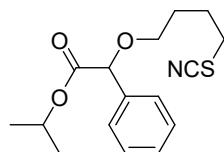

**isopropyl 2-phenyl-2-(4-thiocyanatobutoxy)acetate**

Compound **5p** was obtained in 79% yield (19.4 mg) according to the general procedure (4h). Colorless oil. <sup>1</sup>H NMR (500 MHz, CDCl<sub>3</sub>) δ 7.43 – 7.41 (m, 2H), 7.38 – 7.32 (m, 3H), 5.06 – 5.02 (m, 1H), 4.79 (s, 1H), 3.61 – 3.57 (m, 1H), 3.53 – 3.49 (m, 1H), 3.05 (t, *J* = 7.2 Hz, 2H), 2.01 – 1.98 (m, 2H), 1.84 – 1.79 (m, 2H), 1.25 (d, *J* = 6.3 Hz, 3H), 1.12 (d, *J* = 6.2 Hz, 3H); <sup>13</sup>C NMR (125 MHz, CDCl<sub>3</sub>) δ 170.4, 136.6, 128.6, 128.6, 127.0, 112.4, 81.3, 68.8, 68.7, 33.9, 27.8, 27.1, 21.8, 21.5; HRMS (ESI) *m/z*: [M + H]<sup>+</sup> Calcd for C<sub>16</sub>H<sub>22</sub>NO<sub>3</sub>S [M + H]<sup>+</sup> 308.1320; found 308.1322.

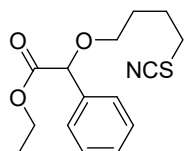

#### ethyl 2-phenyl-2-(4-thiocyanatobutoxy)acetate

Compound **5q** was obtained in 92% yield (27.0 mg) according to the general procedure (4h). Colorless oil.  $^1\text{H}$  NMR (500 MHz,  $\text{CDCl}_3$ )  $\delta$  7.45 – 7.42 (m, 2H), 7.38 – 7.33 (m, 3H), 4.83 (s, 1H), 4.21 – 4.11 (m, 2H), 3.61 – 3.57 (m, 1H), 3.52 – 3.48 (m, 1H), 3.04 (t,  $J = 7.2$  Hz, 2H), 2.02 – 1.95 (m, 2H), 1.84 – 1.79 (m, 2H), 1.22 (t,  $J = 7.1$  Hz, 3H);  $^{13}\text{C}$  NMR (125 MHz,  $\text{CDCl}_3$ )  $\delta$  170.8, 136.5, 128.7, 128.6, 128.6, 127.1, 112.3, 81.2, 68.8, 61.3, 33.9, 27.7, 27.0, 14.1; HRMS (ESI)  $m/z$ :  $[\text{M} + \text{H}]^+$  Calcd for  $\text{C}_{15}\text{H}_{20}\text{NO}_3\text{S}$   $[\text{M} + \text{Na}]^+$  294.1164, found 294.1166.

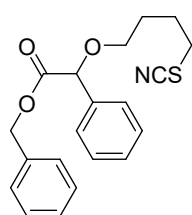

#### benzyl 2-phenyl-2-(4-thiocyanatobutoxy)acetate

Compound **5r** was obtained in 87% yield (30.8 mg) according to the general procedure (4h). Colorless oil.  $^1\text{H}$  NMR (500 MHz,  $\text{CDCl}_3$ )  $\delta$  7.43 – 7.41 (m, 2H), 7.37 – 7.33 (m, 3H), 7.31 – 7.30 (m, 3H), 7.25 – 7.21 (m, 2H), 5.17 – 5.10 (m, 2H), 4.89 (s, 1H), 3.58 – 3.54 (m, 1H), 3.52 – 3.49 (m, 1H), 2.99 (t,  $J = 7.2$  Hz, 2H), 1.98 – 1.93 (m, 2H), 1.81 – 1.76 (m, 2H);  $^{13}\text{C}$  NMR (125 MHz,  $\text{CDCl}_3$ )  $\delta$  170.7, 136.3, 135.4, 128.8, 128.7, 128.6, 128.3, 128.0, 127.2, 112.3, 81.2, 68.8, 66.8, 33.8, 27.7, 27.0; HRMS (ESI)  $m/z$ :  $[\text{M} + \text{H}]^+$  Calcd for  $\text{C}_{20}\text{H}_{22}\text{NO}_3\text{S}$   $[\text{M} + \text{Na}]^+$  356.1320, found 356.1315.

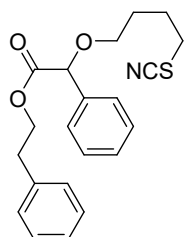

#### phenethyl 2-phenyl-2-(4-thiocyanatobutoxy)acetate

Compound **5s** was obtained in 81% yield (29.8 mg) according to the general procedure (4h). Yellow solid.  $^1\text{H}$  NMR (500 MHz,  $\text{CDCl}_3$ )  $\delta$  7.38 – 7.33 (m, 5H), 7.25 – 7.20 (m, 3H), 7.08 – 7.07 (m, 2H), 4.80 (s, 1H), 4.37 – 4.32 (m, 2H), 3.52 – 3.44 (m, 2H), 3.01 (t,  $J = 7.2$  Hz, 2H), 2.89 – 2.85 (m, 2H), 2.00 – 1.93 (m, 2H), 1.80 – 1.70 (m, 2H);  $^{13}\text{C}$  NMR (125 MHz,  $\text{CDCl}_3$ )  $\delta$  170.7, 137.4, 136.4, 128.9, 128.5, 127.1, 126.6, 112.4, 81.2, 68.8, 65.6, 34.9, 33.9, 27.7, 27.0; HRMS (ESI)  $m/z$ :  $[\text{M} + \text{H}]^+$  Calcd for  $\text{C}_{21}\text{H}_{24}\text{NO}_3\text{S}$  370.1477; found 370.1480.

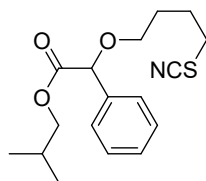

#### isobutyl 2-phenyl-2-(4-thiocyanatobutoxy)acetate

Compound **5t** was obtained in 79% yield (30.6 mg) according to the general procedure (the reaction was complete for 4h). Colorless oil.  $^1\text{H}$  NMR (500 MHz,  $\text{CDCl}_3$ )  $\delta$  7.44 – 7.42 (m, 2H), 7.38 – 7.32 (m, 3H), 4.84 (s, 1H), 3.93 – 3.86 (m, 2H), 3.62 – 3.58 (m, 1H), 3.53 – 3.49 (m, 1H), 3.04 (t,  $J = 7.2$  Hz, 2H), 2.01 – 1.97 (m, 2H), 1.88 – 1.84 (m, 1H), 1.84 – 1.80 (m, 2H), 0.83 – 0.81 (m, 6H);  $^{13}\text{C}$  NMR (125 MHz,  $\text{CDCl}_3$ )  $\delta$  170.9, 136.7, 128.7, 128.6, 127.1, 112.3, 81.2, 71.1, 68.8, 33.9, 27.8, 28.7, 27.0, 18.9; HRMS (ESI)  $m/z$ :  $[\text{M} + \text{H}]^+$  Calcd for  $\text{C}_{17}\text{H}_{24}\text{NO}_3\text{S}$   $[\text{M} + \text{H}]^+$  322.1477, found 322.1481.

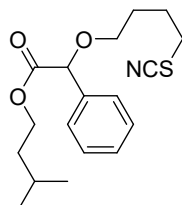

#### isopentyl 2-phenyl-2-(4-thiocyanatobutoxy)acetate

Compound **5u** was obtained in 82% yield (30.5 mg) according to the general procedure (the reaction was complete for 6h). Yellow oil.  $^1\text{H}$  NMR (500 MHz,  $\text{CDCl}_3$ )  $\delta$  7.42 (d,  $J = 6.6$  Hz, 2H), 7.38 – 7.31 (m, 3H), 4.82 (s, 1H), 4.15 – 4.12 (m, 2H), 3.59 – 3.57 (m, 1H), 3.52 – 3.49 (m, 1H), 3.04 (t,  $J = 7.2$  Hz, 2H), 2.00 – 1.97 (m, 2H), 1.84 – 1.80 (m, 2H), 1.59 – 1.51 (m, 1H), 1.48 – 1.44 (m, 2H), 0.84 (dd,  $J = 9.8, 6.6$  Hz, 6H);  $^{13}\text{C}$  NMR (125 MHz,  $\text{CDCl}_3$ )  $\delta$  170.9, 136.5, 128.7, 128.6, 127.1, 112.4, 81.2, 68.8, 63.9, 37.1, 33.9, 27.7, 27.0, 24.9, 22.4, 22.3; HRMS (ESI)  $m/z$ :  $[\text{M} + \text{H}]^+$  Calcd for  $\text{C}_{18}\text{H}_{26}\text{NO}_3\text{S}$   $[\text{M} + \text{H}]^+$  336.1633, found 336.1637.

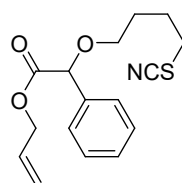

#### allyl 2-phenyl-2-(4-thiocyanatobutoxy)acetate

Compound **5v** was obtained in 88% yield (37.0 mg) according to the general procedure (the reaction was complete for 6h). Yellow oil.  $^1\text{H}$  NMR (500 MHz,  $\text{CDCl}_3$ )  $\delta$  7.45 – 7.3 (m, 2H), 7.39 – 7.33 (m, 3H), 5.89 – 5.80 (m, 1H), 5.21 – 5.17 (m, 2H), 4.87 (s, 1H), 4.82 – 4.60 (m, 1H), 3.62 – 3.57 (m, 1H), 3.53 – 3.49 (m, 1H), 3.03 (t,  $J = 7.2$  Hz, 2H), 2.00 – 1.95 (m, 2H), 1.84 – 1.80 (m, 2H);  $^{13}\text{C}$  NMR (125 MHz,  $\text{CDCl}_3$ )  $\delta$  170.5, 136.4, 131.6, 128.8, 128.7, 127.2, 127.1, 118.5, 112.3, 81.2, 68.8, 65.6, 33.9, 27.7, 27.0; HRMS (ESI)  $m/z$ :  $[\text{M} + \text{H}]^+$  Calcd for  $\text{C}_{16}\text{H}_{20}\text{NO}_3\text{S}$   $[\text{M} + \text{H}]^+$  306.1164, found 306.1167.

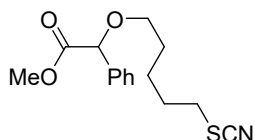

**methyl 2-phenyl-2-((5-thiocyanatopentyl)oxy)acetate**

Compound **5w** was obtained in 64% yield (18.8 mg) according to the general procedure (the reaction was complete for 6h). Colorless oil. <sup>1</sup>H NMR (500 MHz, CDCl<sub>3</sub>) δ 7.45 – 7.43 (m, 2H), 7.39 – 7.33 (m, 3H), 4.86 (s, 1H), 3.71(s, 3H), 3.56 – 3.53 (m, 1H), 3.48 – 3.45(m, 1H), 2.95 (t, *J* = 7.3 Hz, 2H), 1.88 – 1.81 (m, 2H), 1.72 – 1.67 (m, 2H), 1.60 – 1.53 (m, 2H); <sup>13</sup>C NMR (125 MHz, CDCl<sub>3</sub>) δ 171.3, 136.5, 128.7, 128.6, 127.2, 112.3, 81.1, 69.3, 52.3, 33.9, 29.6, 28.9, 24.7; HRMS (ESI) *m/z*: [M + H]<sup>+</sup> Calcd for C<sub>25</sub>H<sub>25</sub>N<sub>2</sub>O<sub>3</sub>S [M+H]<sup>+</sup> 294.1164, found 294.1166.

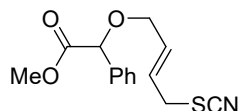

**methyl (E)-2-phenyl-2-((4-thiocyanatobut-2-en-1-yl)oxy)acetate**

Compound **5x** was obtained in 47% yield (11.8 mg) according to the general procedure (the reaction was complete for 4h). Yellow oil. <sup>1</sup>H NMR (500 MHz, CDCl<sub>3</sub>) δ 7.45 – 7.43 (m, 2H), 7.40 – 7.35 (m, 3H), 5.97 – 5.93 (m, 1H), 5.82 – 5.77 (m, 1H), 4.92 (s, 1H), 4.24 – 4.20 (m, 1H), 4.16 – 4.12 (m, 1H), 3.76 – 3.74 (m, 1H), 3.72 (s, 3H), 3.67 – 3.63 (m, 1H); <sup>13</sup>C NMR (125 MHz, CDCl<sub>3</sub>) δ 170.9, 135.9, 131.8, 129.0, 128.8, 127.4, 125.9, 111.9, 80.5, 64.7, 52.4, 30.8; HRMS (ESI) *m/z*: [M + H]<sup>+</sup> Calcd for C<sub>14</sub>H<sub>16</sub>NO<sub>3</sub>S 278.0851; found 278.0852.

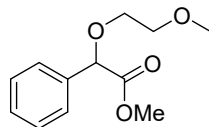

**methyl 2-(2-methoxyethoxy)-2-phenylacetate**

Compound **6a** was obtained in 57% yield (12.8 mg) according to the general procedure (4h). Colorless oil. <sup>1</sup>H NMR (500 MHz, CDCl<sub>3</sub>) δ 7.47 – 7.45 (m, 2H), 7.38 – 7.30 (m, 3H), 4.99 (s, 1H), 3.72 – 3.69 (m, 1H), 3.71 (s, 3H), 3.66 – 3.63 (m, 1H), 3.62 – 3.57 (m, 2H), 3.37 (s, 3H); <sup>13</sup>C NMR (125 MHz, CDCl<sub>3</sub>) δ 171.3, 136.4, 128.7, 128.6, 127.3, 81.4, 72.0, 69.0, 59.0, 52.2; HRMS (ESI) *m/z*: [M + H]<sup>+</sup> Calcd for C<sub>12</sub>H<sub>17</sub>O<sub>4</sub> 225.2217; found 225.2219.

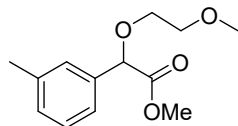

**methyl 2-(2-methoxyethoxy)-2-(m-tolyl)acetate**

Compound **6b** was obtained in 56% yield (13.3 mg) according to the general procedure (4h). Colorless oil. <sup>1</sup>H NMR (500 MHz, CDCl<sub>3</sub>) δ 7.27 (s, 1H), 7.24 – 7.23 (m, 2H), 7.14 – 7.13 (m, 1H), 4.95 (s, 1H), 3.71 (s, 3H), 3.70 – 3.67 (m, 1H), 3.65 – 3.63 (m, 3H), 3.36 (s, 3H), 2.35 (s, 3H); <sup>13</sup>C NMR (125 MHz, CDCl<sub>3</sub>) δ 171.4, 138.4,

136.3, 129.5, 128.5, 127.9, 124.5, 81.4, 72.0, 68.9, 59.0, 52.2, 21.4; HRMS (ESI)  $m/z$ :  $[M + H]^+$  Calcd for  $C_{13}H_{19}O_4$  239.1283; found 239.1287.

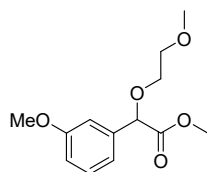

#### **methyl 2-(2-methoxyethoxy)-2-(3-methoxyphenyl)acetate**

Compound **6c** was obtained in 66% yield (16.8 mg) according to the general procedure (4h). Colorless oil.  $^1H$  NMR (500 MHz,  $CDCl_3$ )  $\delta$  7.26 (t,  $J = 7.8$  Hz, 1H), 7.02 (t,  $J = 4.9$  Hz, 2H), 6.88 – 6.86 (m, 1H), 4.96 (s, 1H), 3.81 (s, 3H), 3.71 (s, 3H), 3.69–3.67 (m, 1H), 3.66–3.58 (m, 3H), 3.37 (s, 3H);  $^{13}C$  NMR (125 MHz,  $CDCl_3$ )  $\delta$  171.2, 159.8, 137.9, 129.6, 119.7, 114.6, 112.4, 81.3, 72.0, 69.0, 59.0, 55.3, 52.3; HRMS (ESI)  $m/z$ :  $[M + H]^+$  Calcd for  $C_{13}H_{19}O_5$  255.1232; found 255.1236.

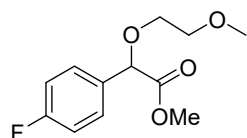

#### **methyl 2-(4-fluorophenyl)-2-(2-methoxyethoxy)acetate**

Compound **6d** was obtained in 53% yield (12.8 mg) according to the general procedure (4h). Colorless oil.  $^1H$  NMR (500 MHz,  $CDCl_3$ )  $\delta$  7.45–7.42 (m, 2H), 7.06–7.03 (m, 2H), 4.97 (s, 1H), 3.71 (s, 3H), 3.69 – 3.67 (m, 1H), 3.65 – 3.58 (m, 1H), 3.37 (s, 3H);  $^{13}C$  NMR (125 MHz,  $CDCl_3$ )  $\delta$  171.2, 162.9 (d,  $J = 245.8$  Hz), 132.3 (d,  $J = 3.2$  Hz), 129.0 (d,  $J = 8.3$  Hz), 115.5 (d,  $J = 21.5$  Hz), 80.7, 72.0, 69.1, 59.0, 52.3; HRMS (ESI)  $m/z$ :  $[M + H]^+$  Calcd for  $C_{12}H_{16}FO_4$  243.1033; found 243.1037.

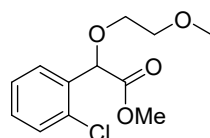

#### **methyl 2-(2-chlorophenyl)-2-(2-methoxyethoxy)acetate**

Compound **6e** was obtained in 76% yield (19.6 mg) according to the general procedure (4h). Colorless oil.  $^1H$  NMR (500 MHz,  $CDCl_3$ )  $\delta$  7.55 – 7.53 (m, 1H), 7.39 – 7.37 (m, 1H), 7.30 – 7.26 (m, 2H), 5.47 (s, 1H), 3.79 – 3.74 (m, 1H), 3.72 (s, 3H), 3.69 – 3.64 (m, 1H), 3.60 – 3.58 (m, 2H), 3.36 (s, 3H);  $^{13}C$  NMR (125 MHz,  $CDCl_3$ )  $\delta$  170.6, 134.5, 133.8, 129.8, 129.6, 128.9, 127.2, 77.6, 71.8, 69.4, 59.0, 52.3; HRMS (ESI)  $m/z$ :  $[M + H]^+$  Calcd for  $C_{12}H_{16}ClO_4$  259.0737; found 259.0741.

## **6. Copies of NMR spectra for 5a–5x, 6a–6e**

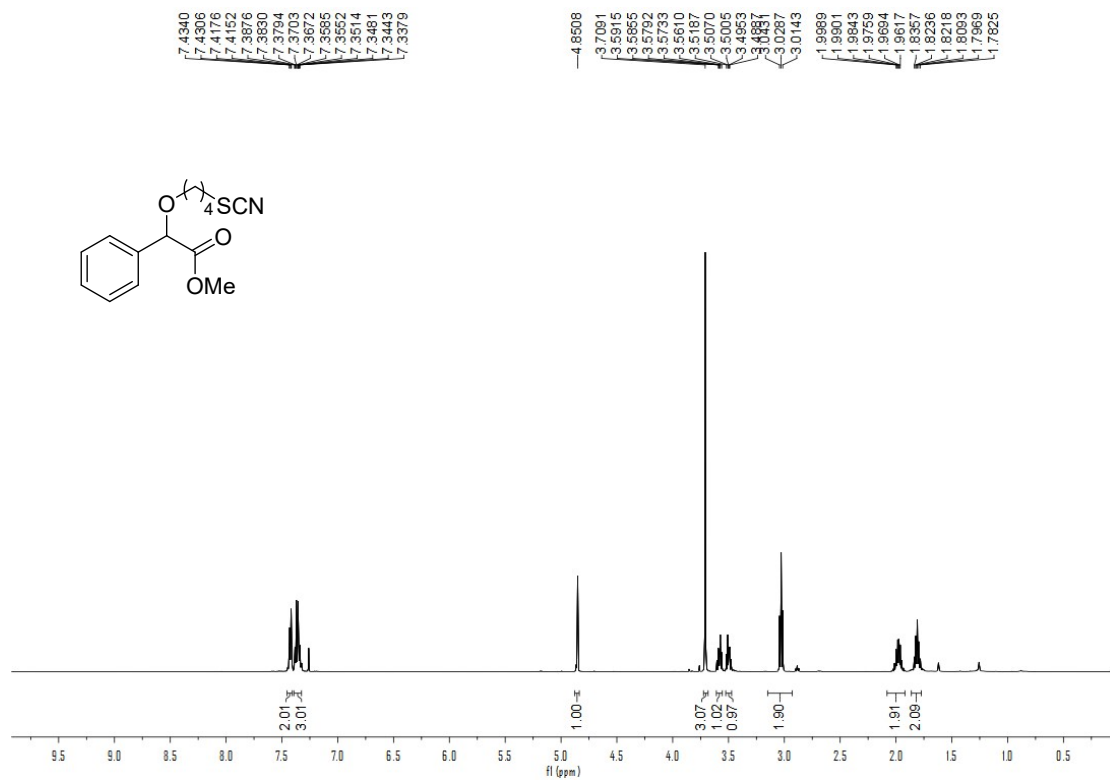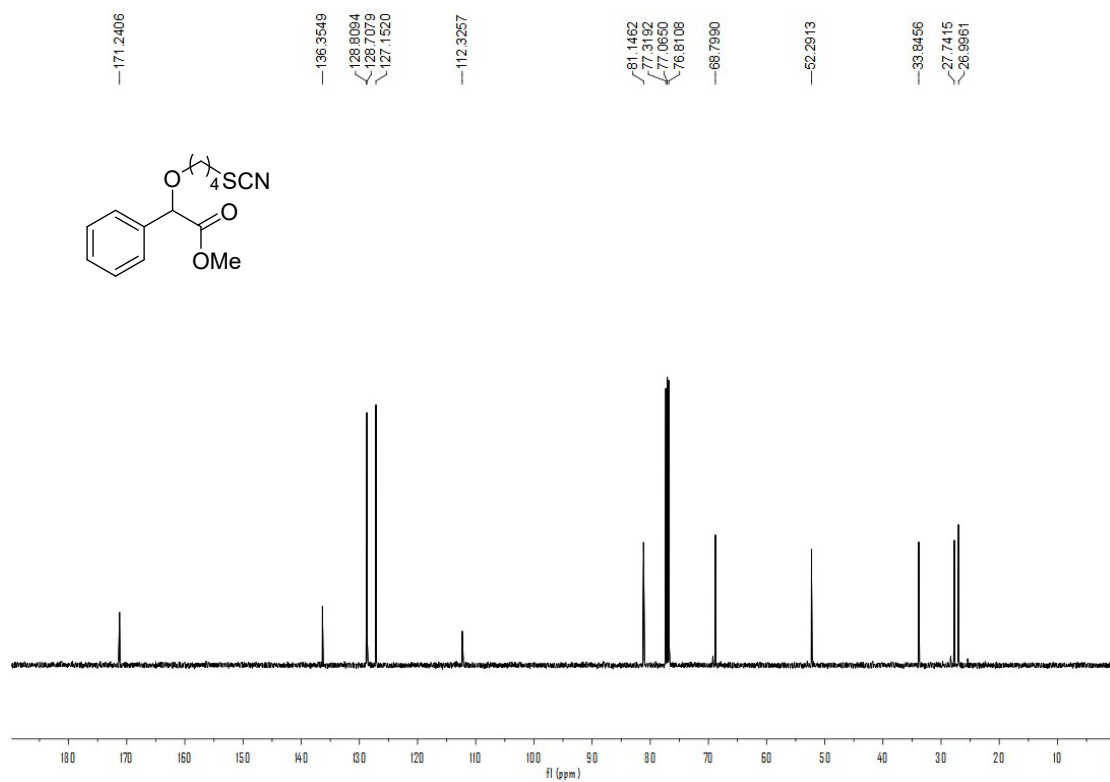

5a

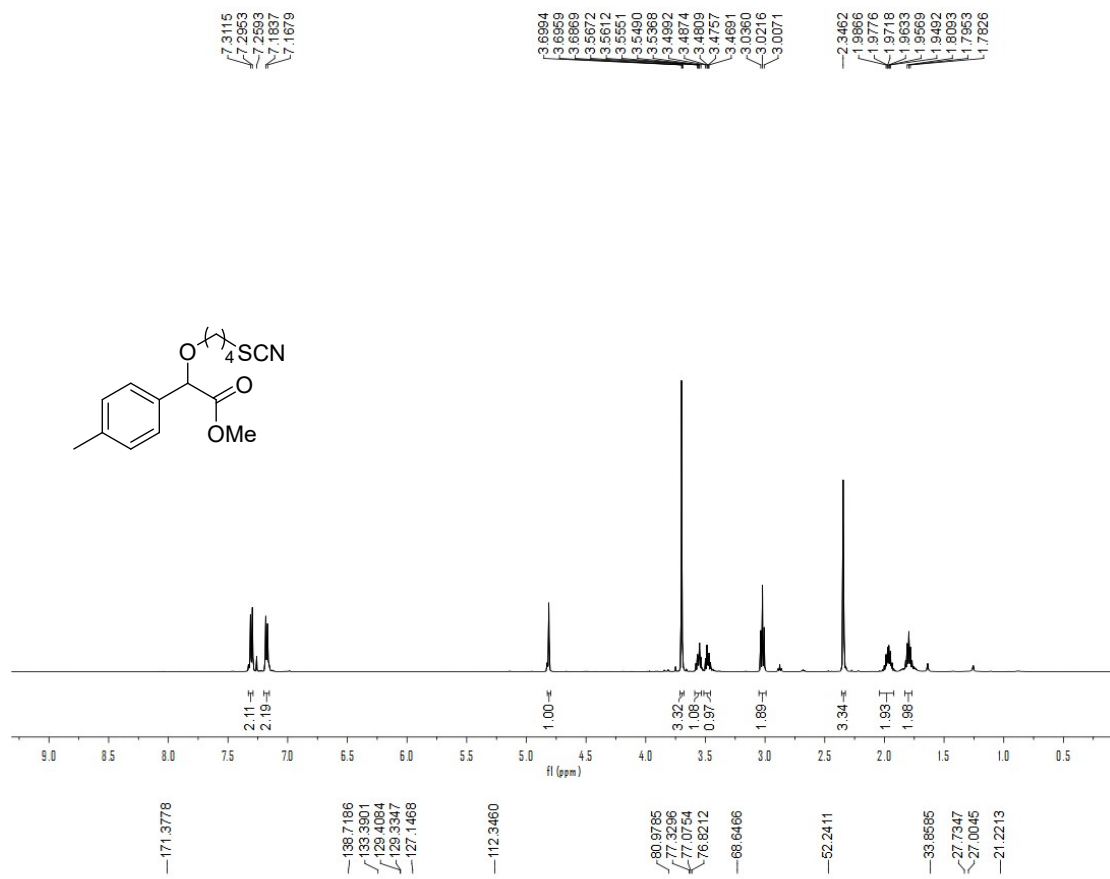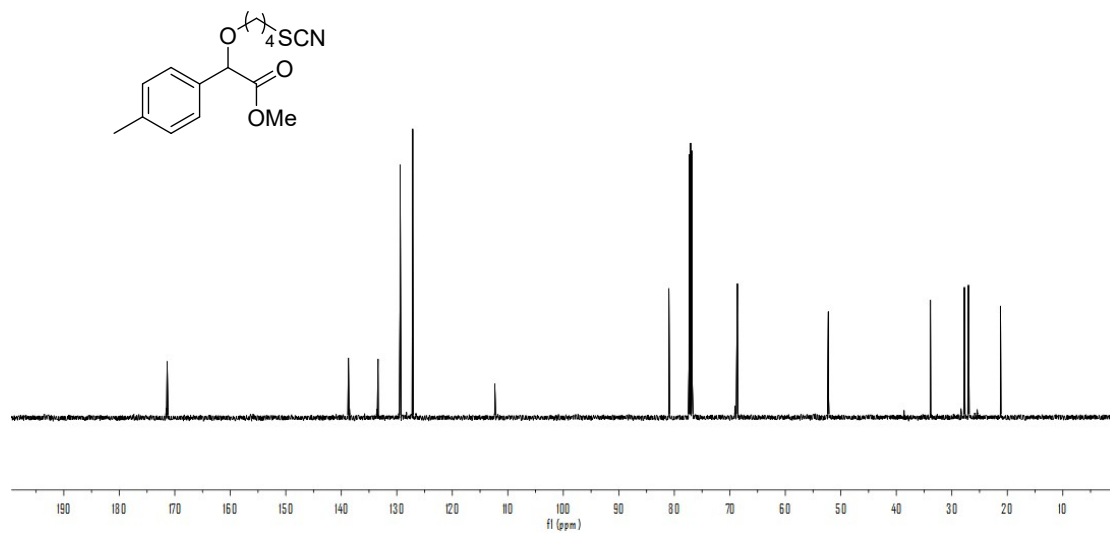

5b



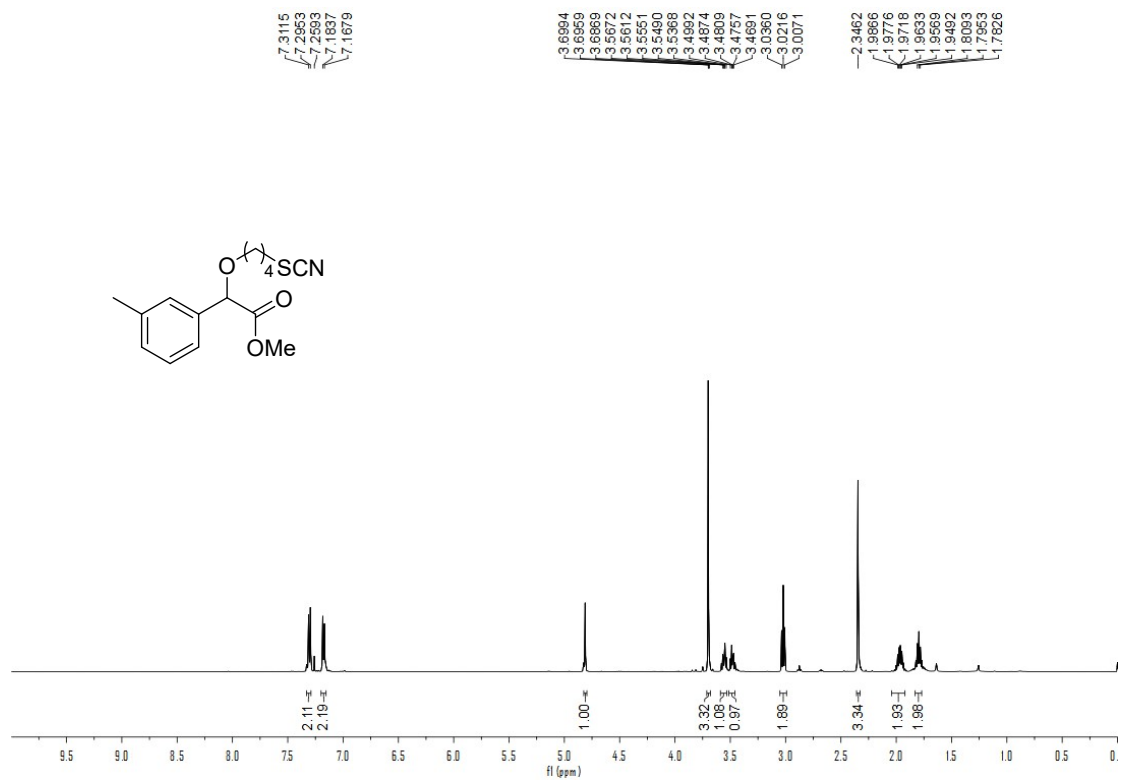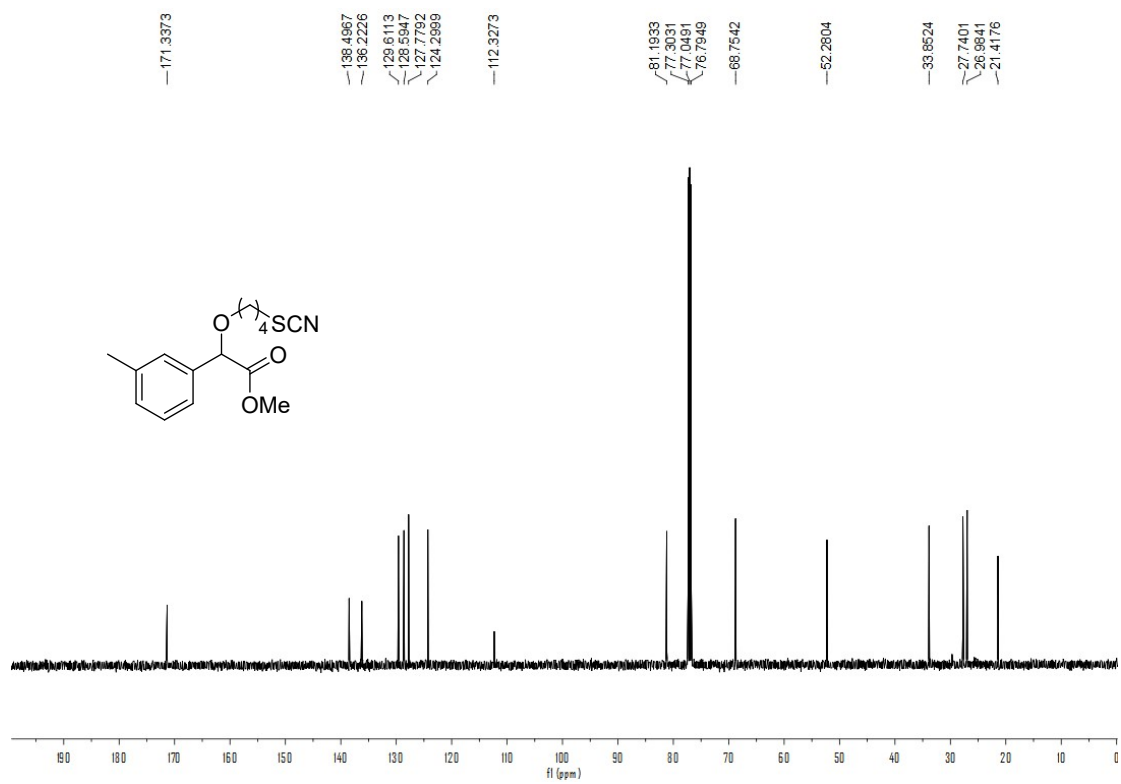

5c

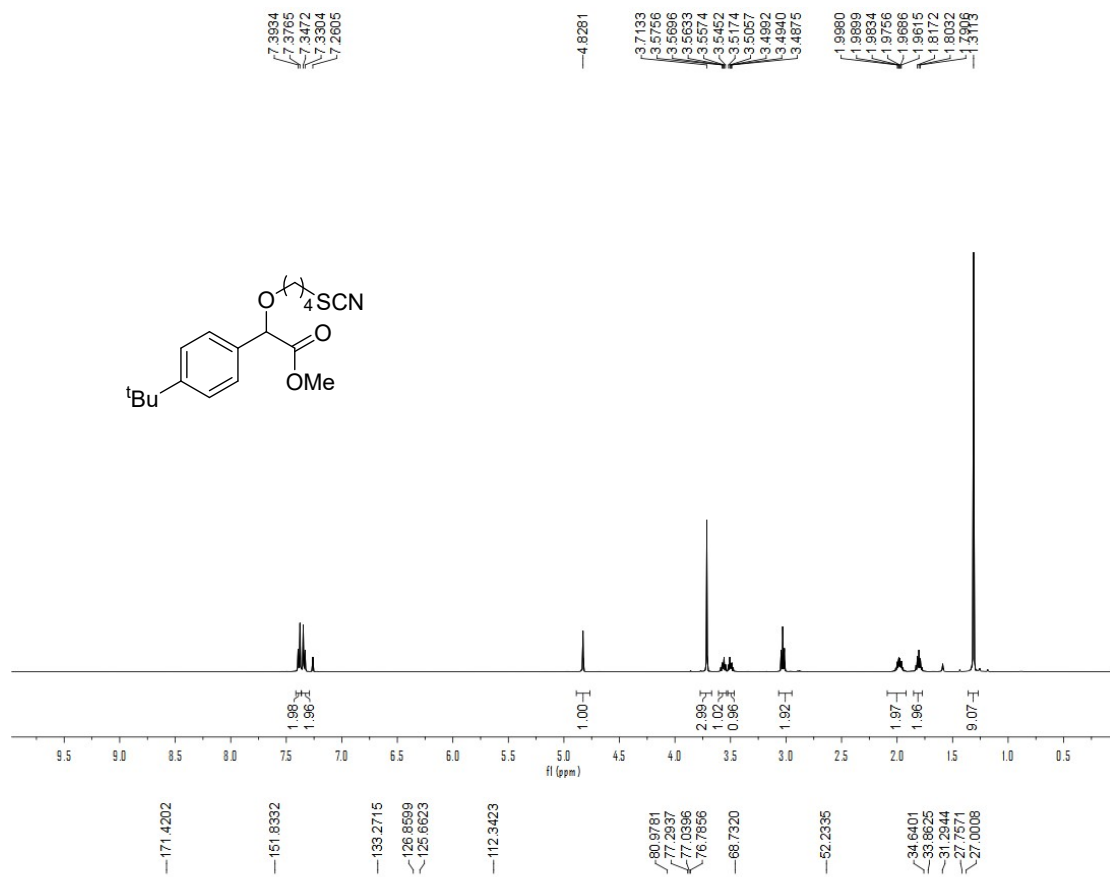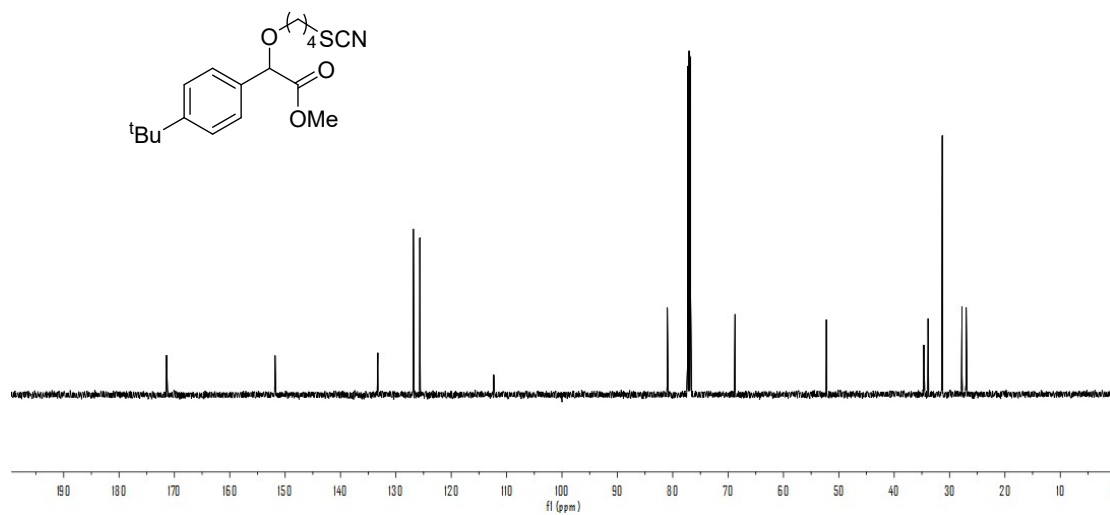

5d

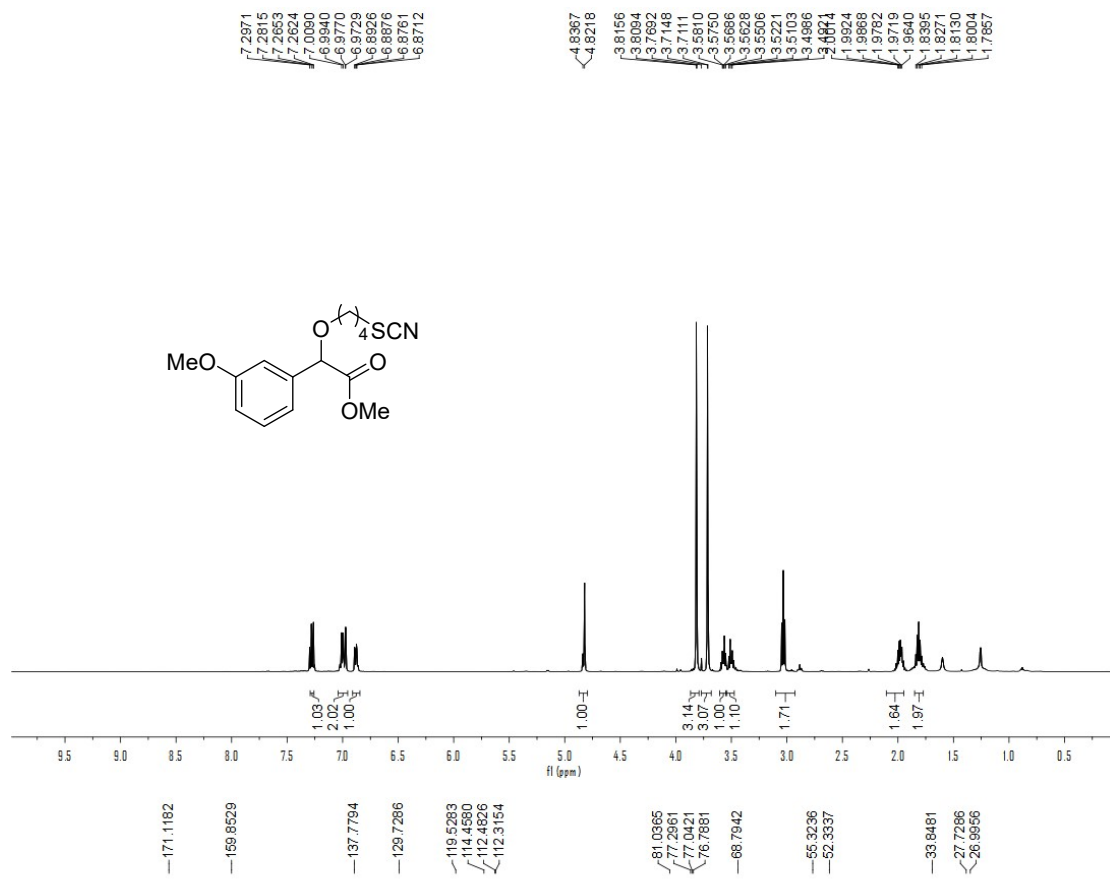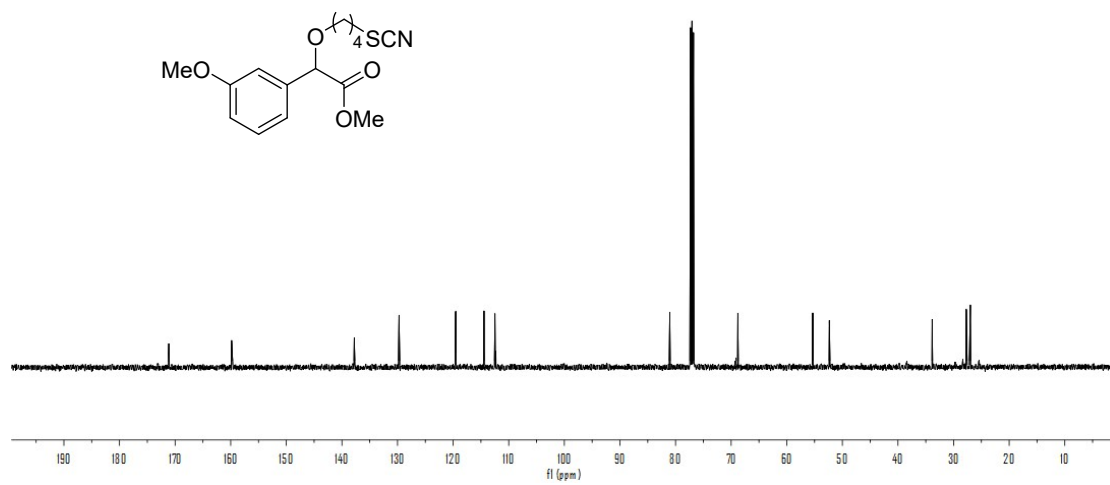

5e

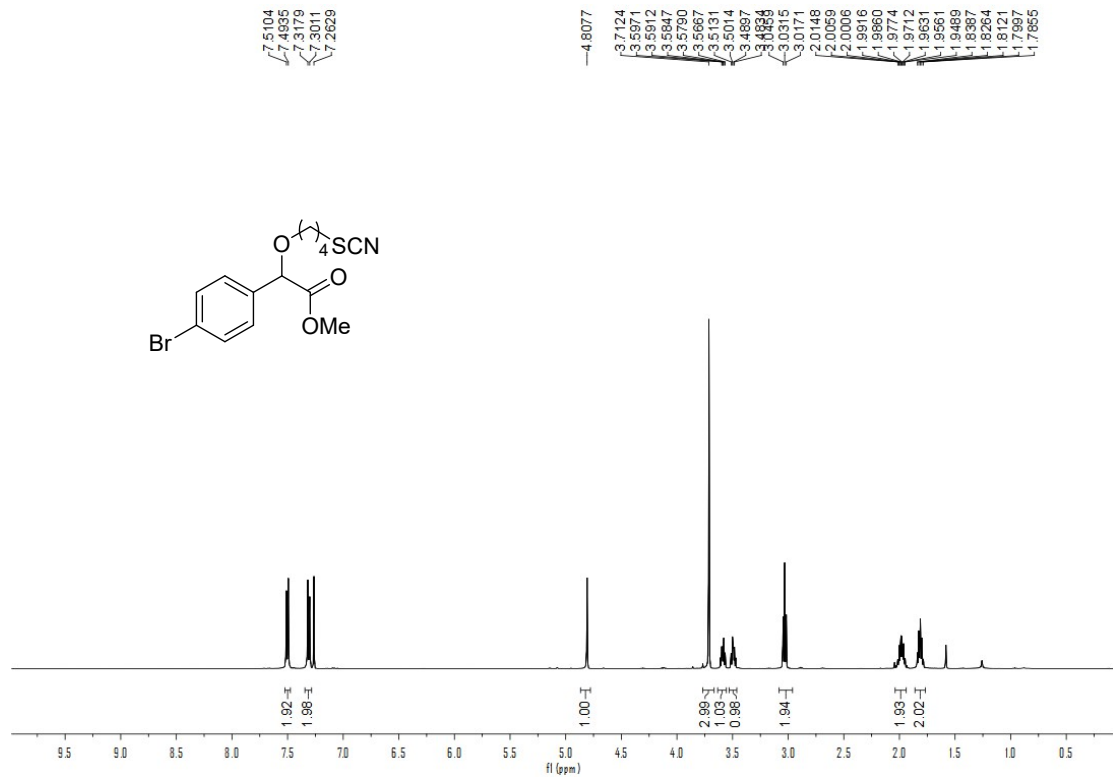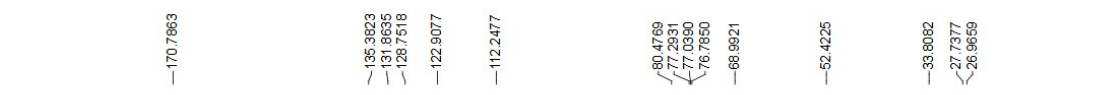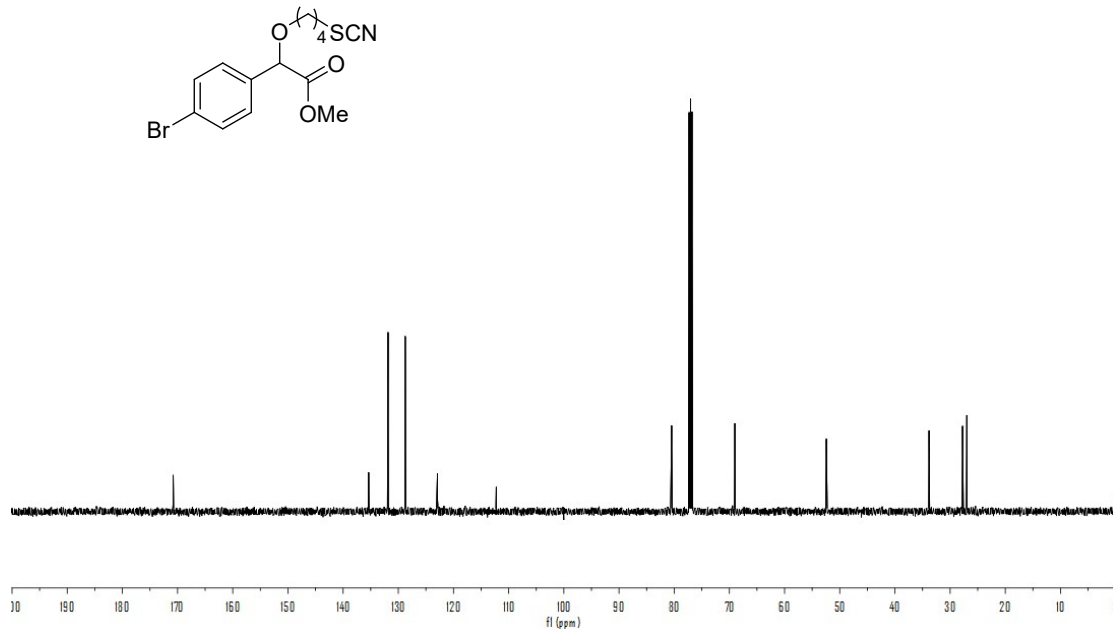

5f

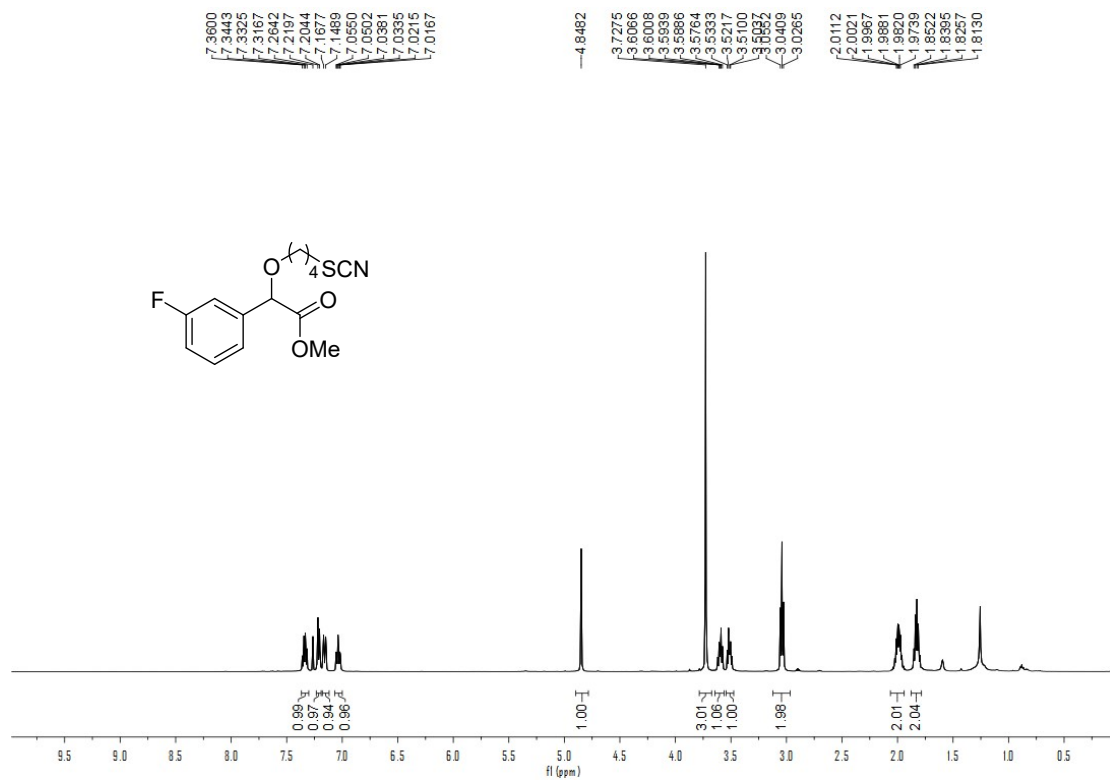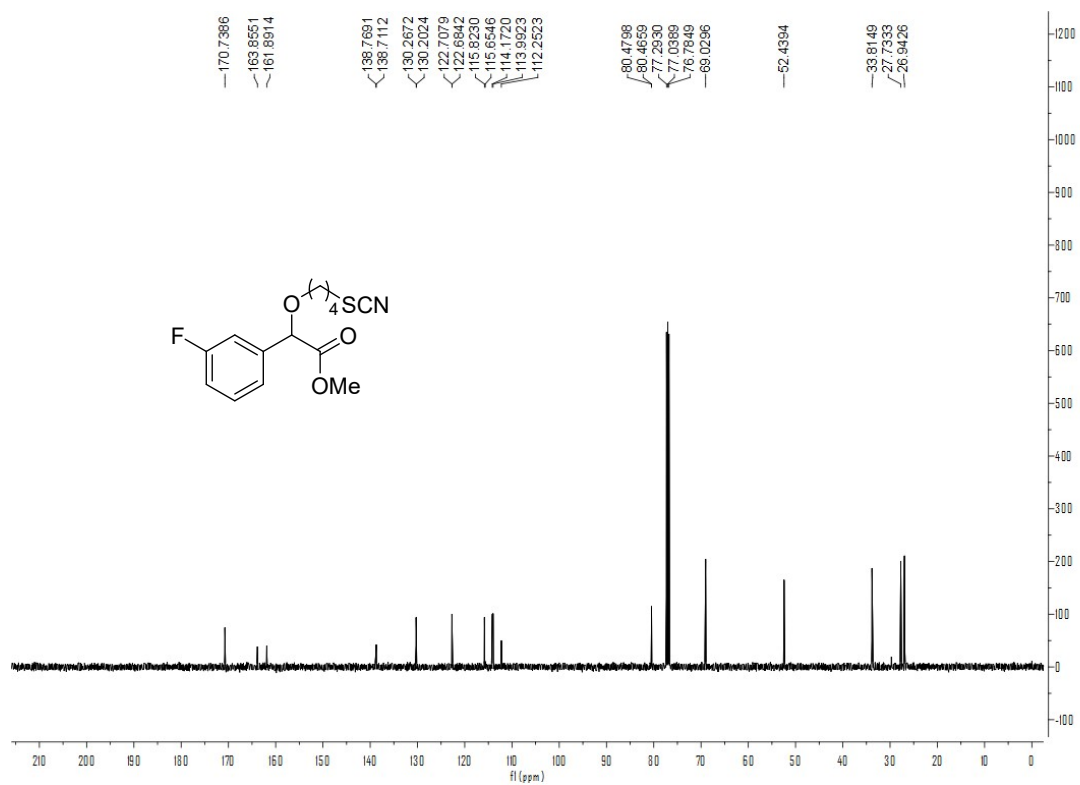

5g

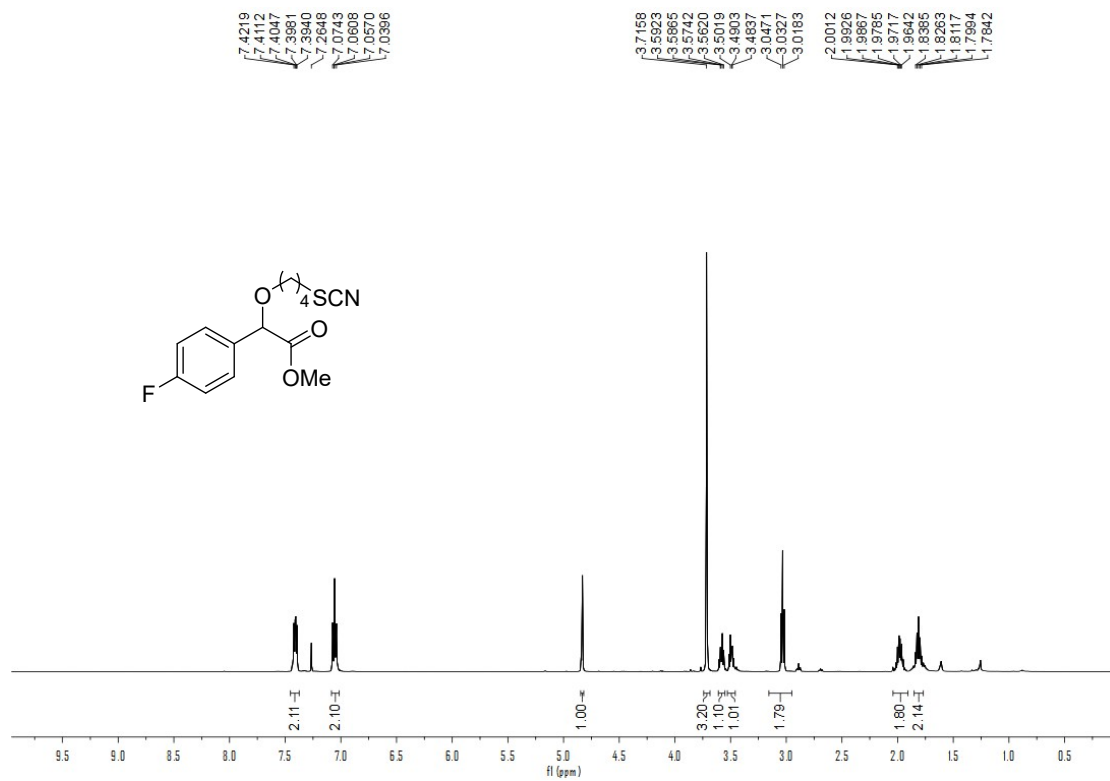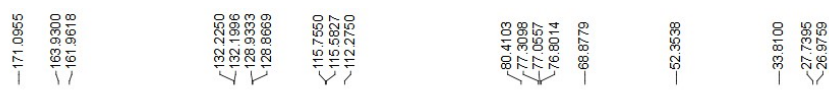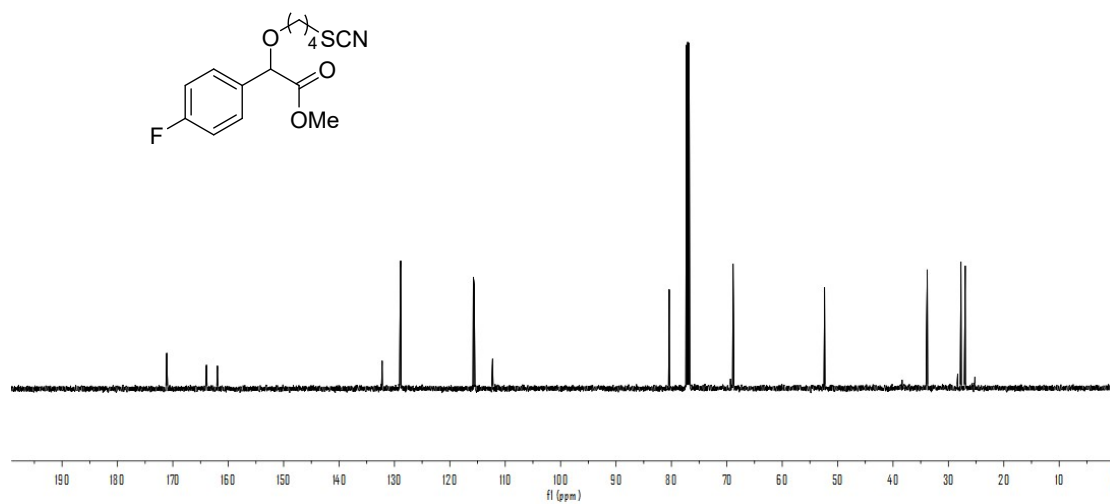

5h

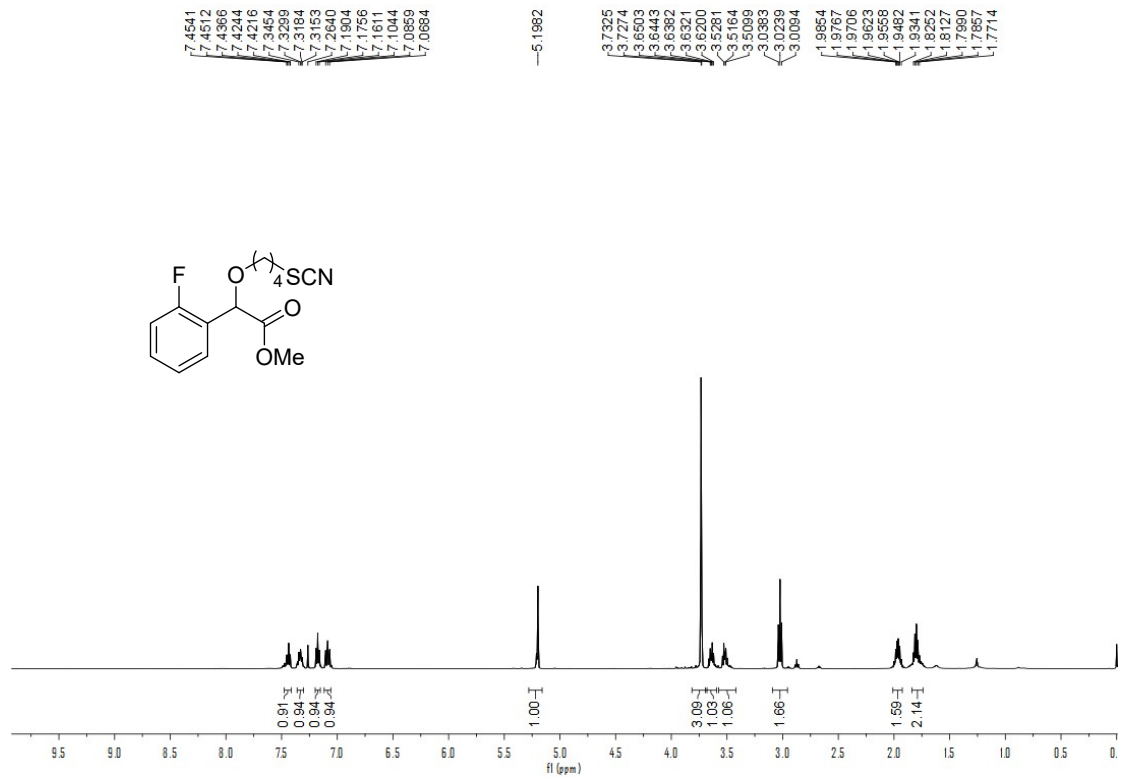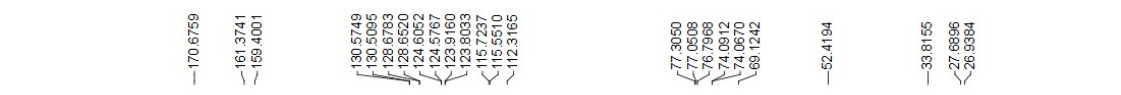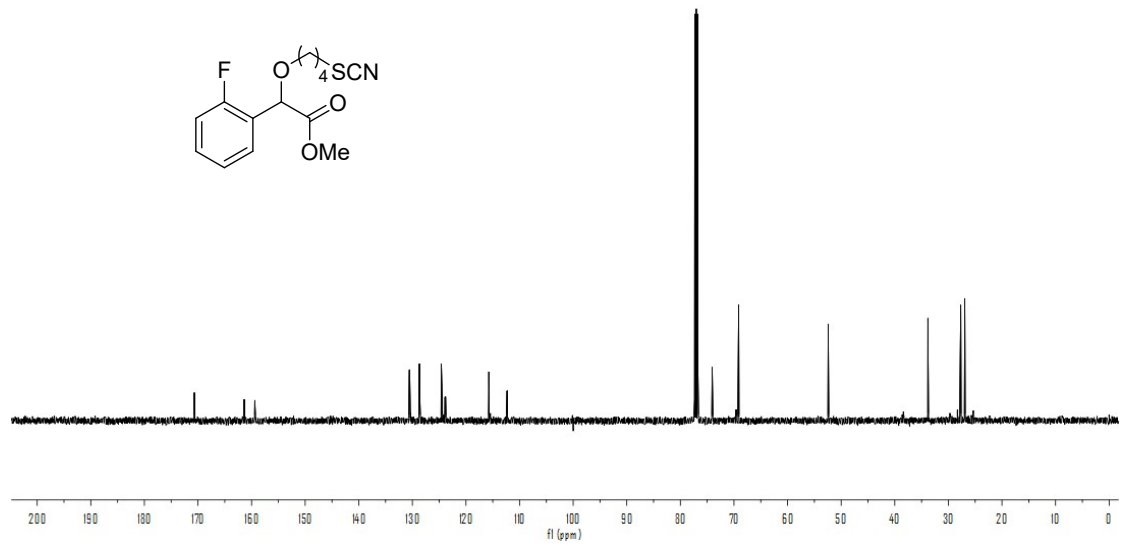

5i

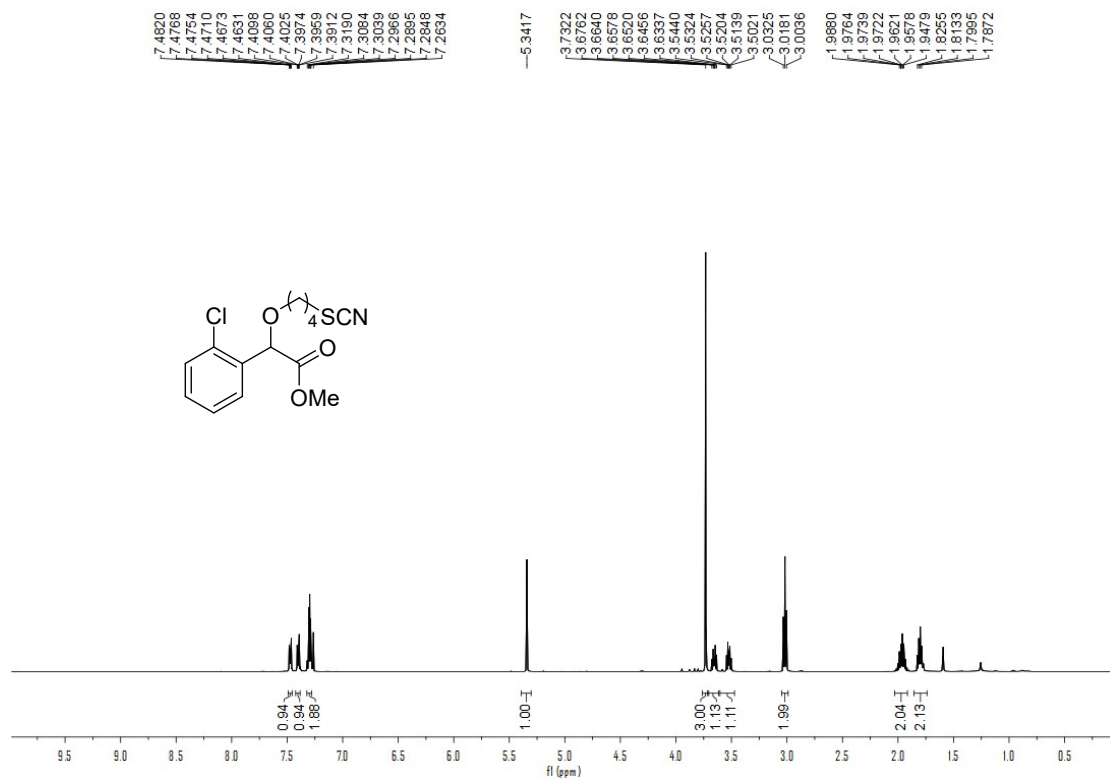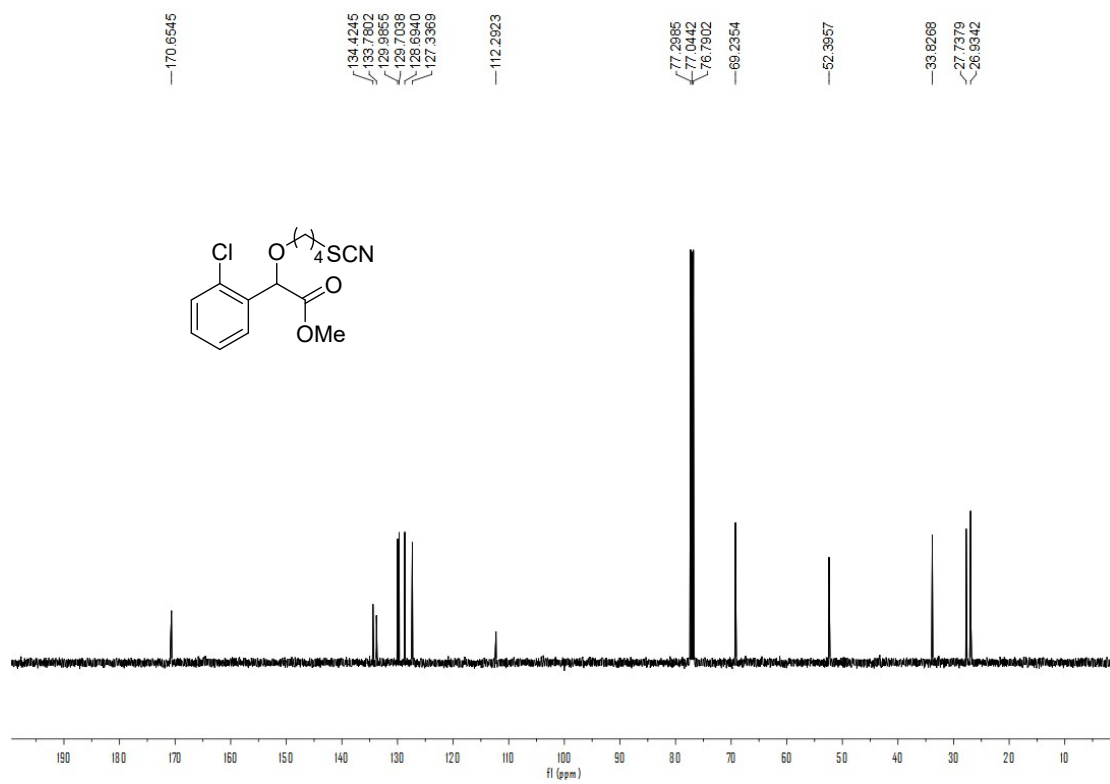

5j



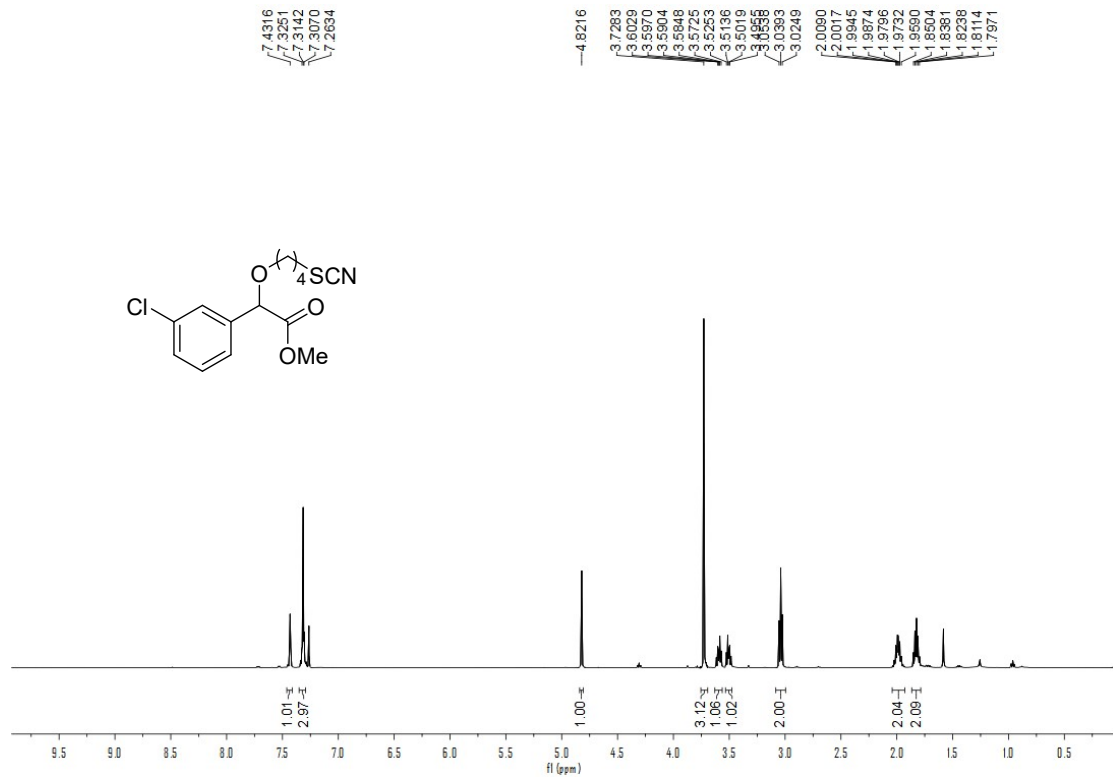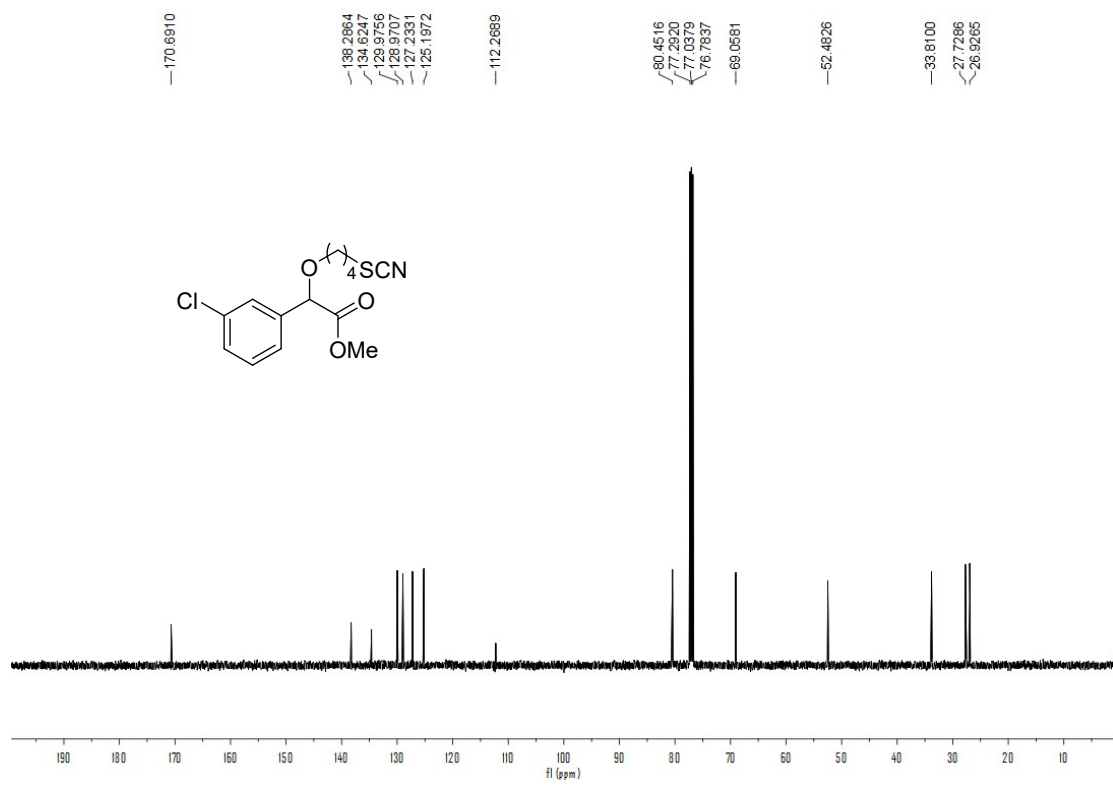

5k

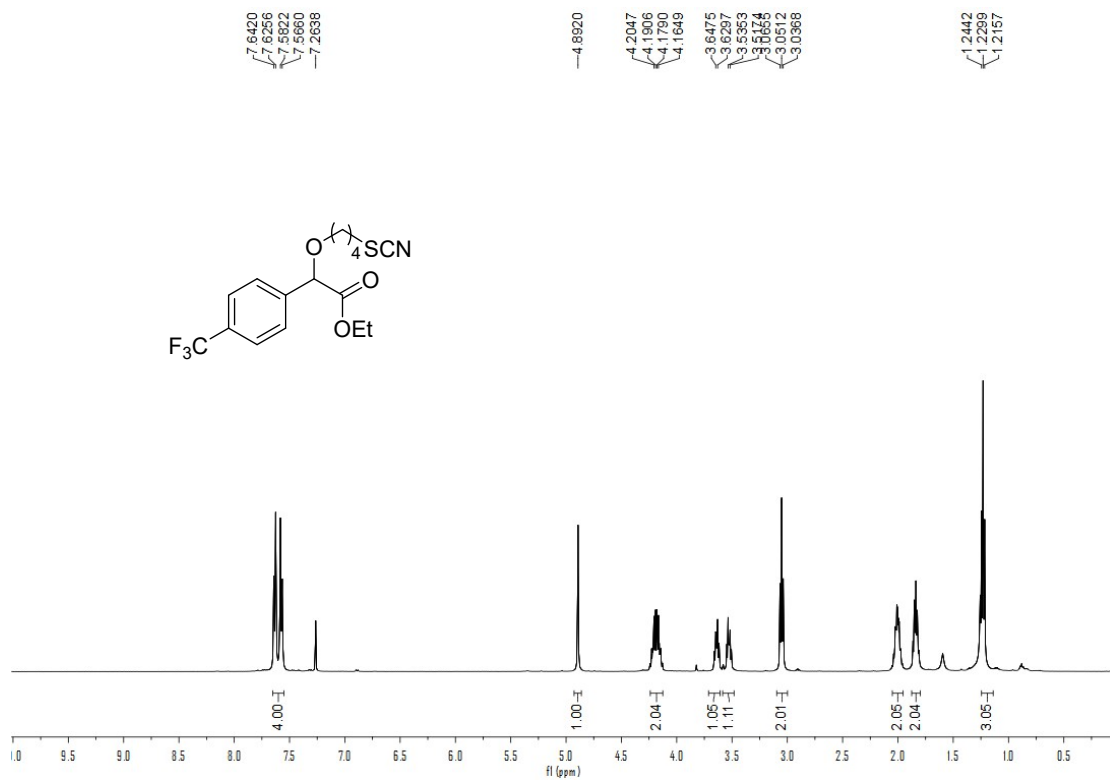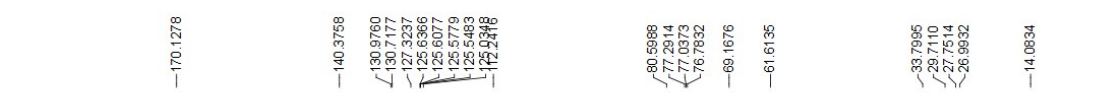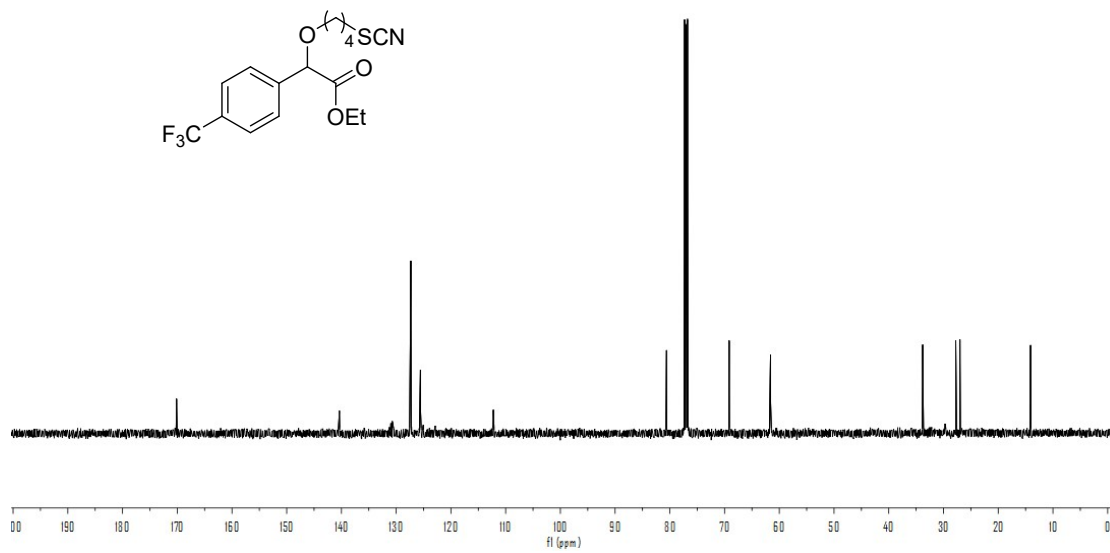

51

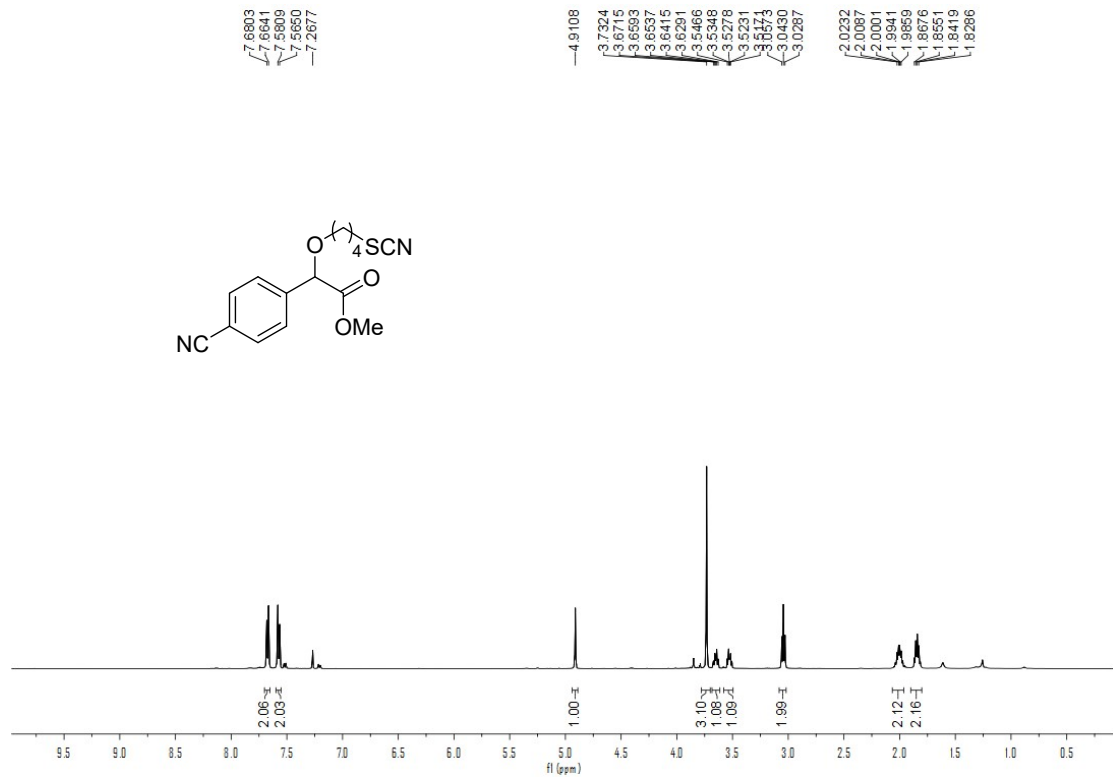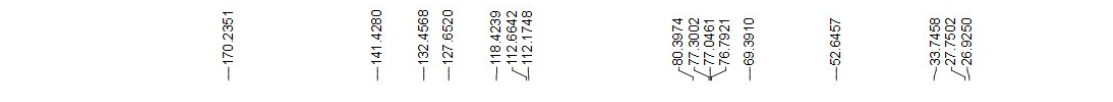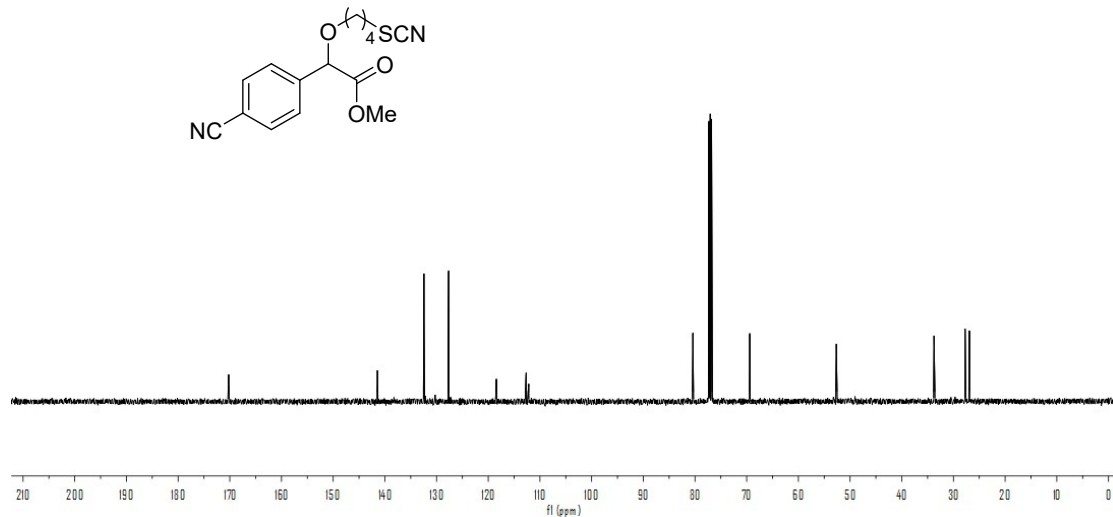

5m

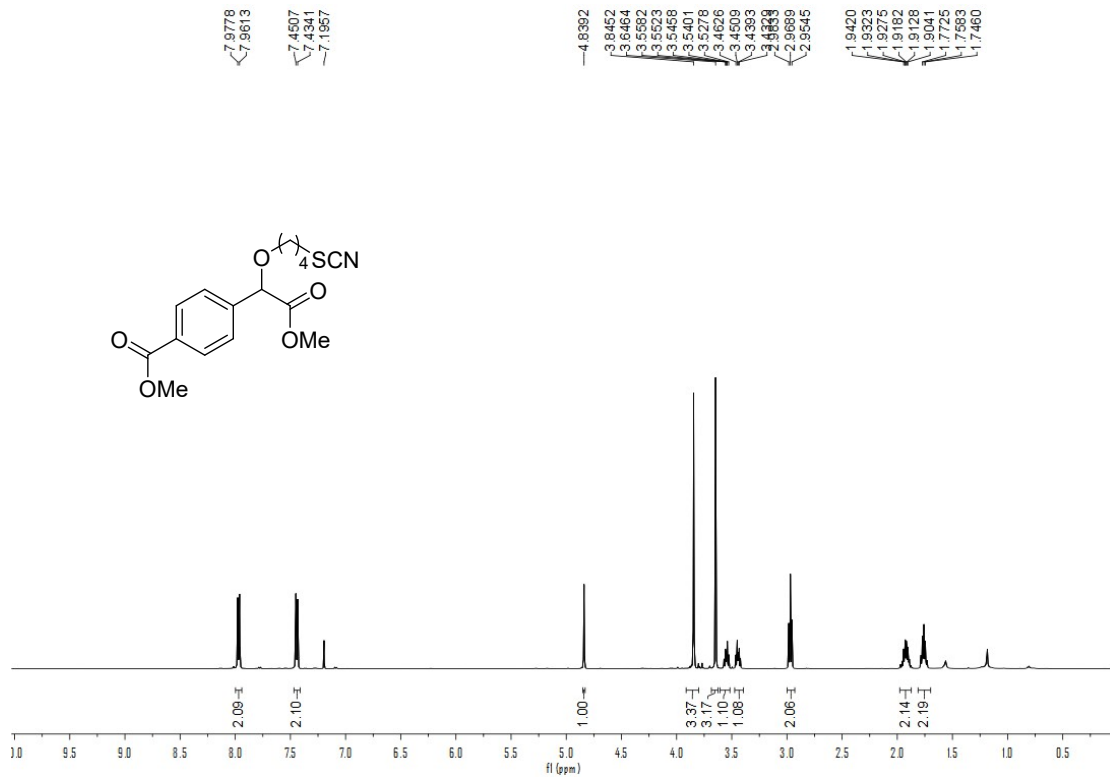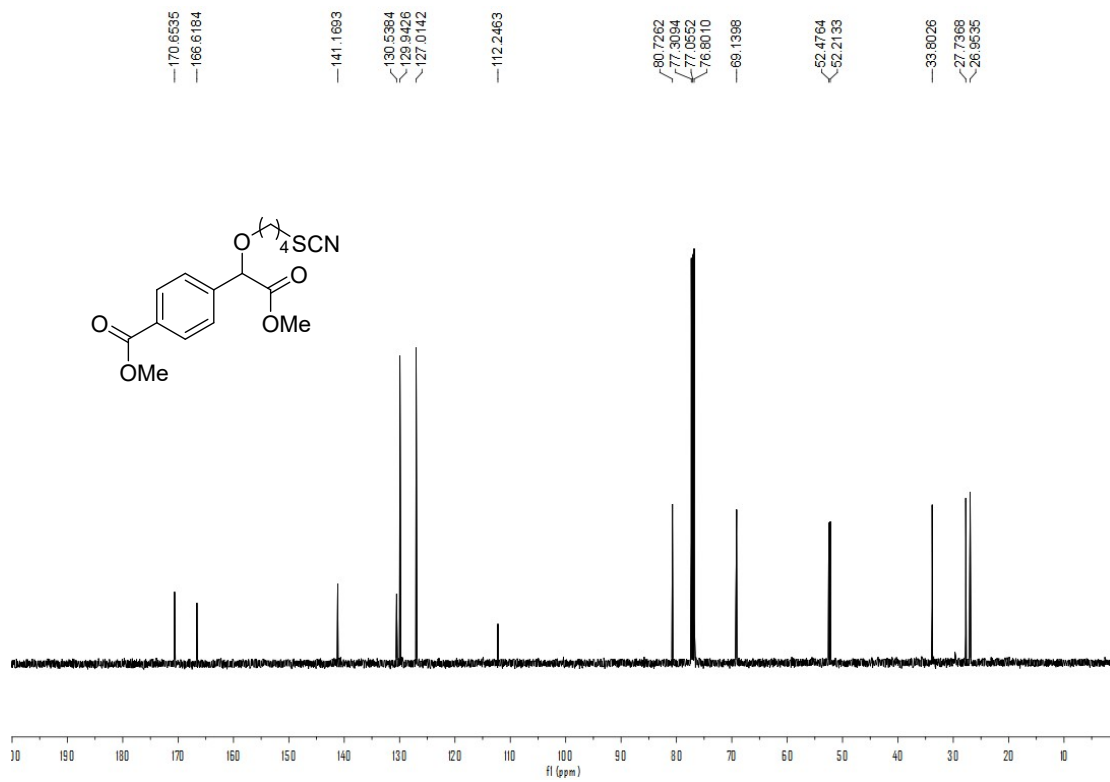

5n

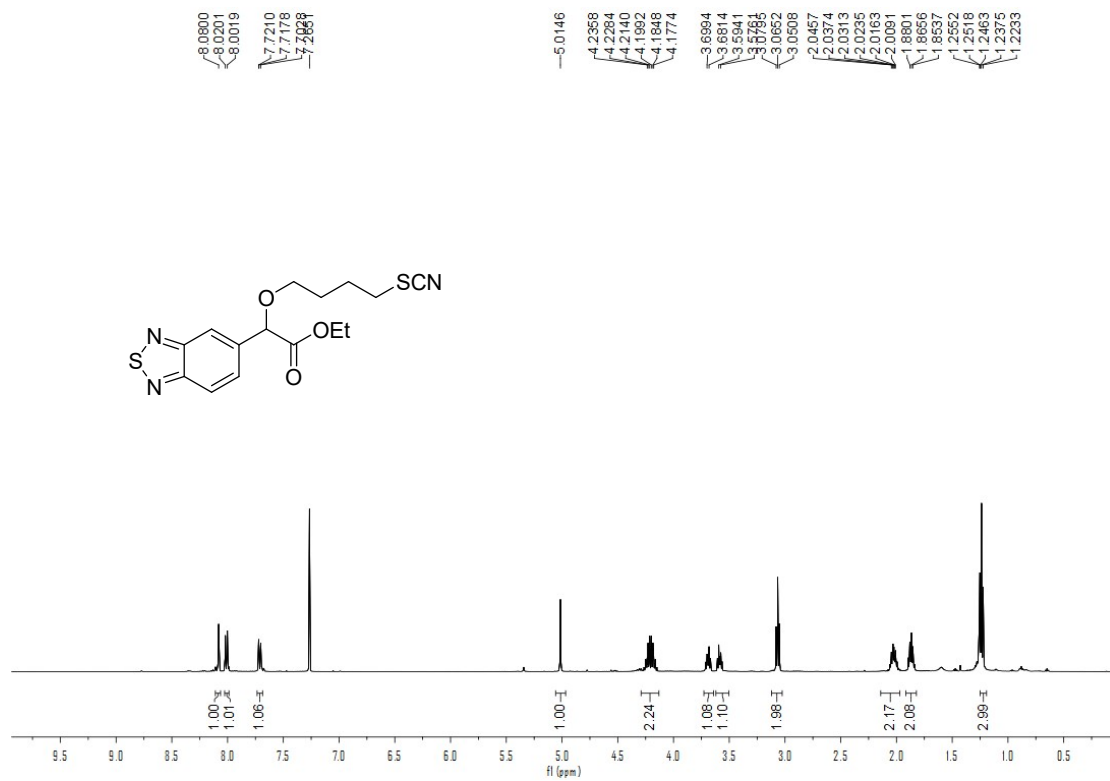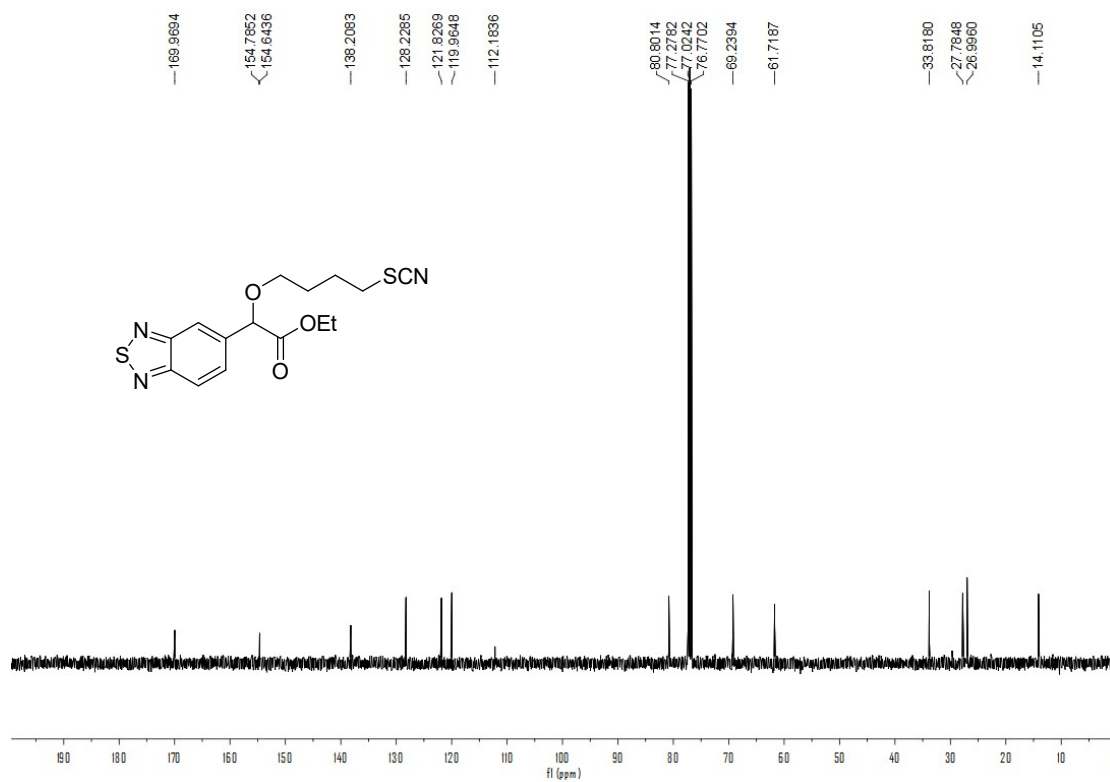

50

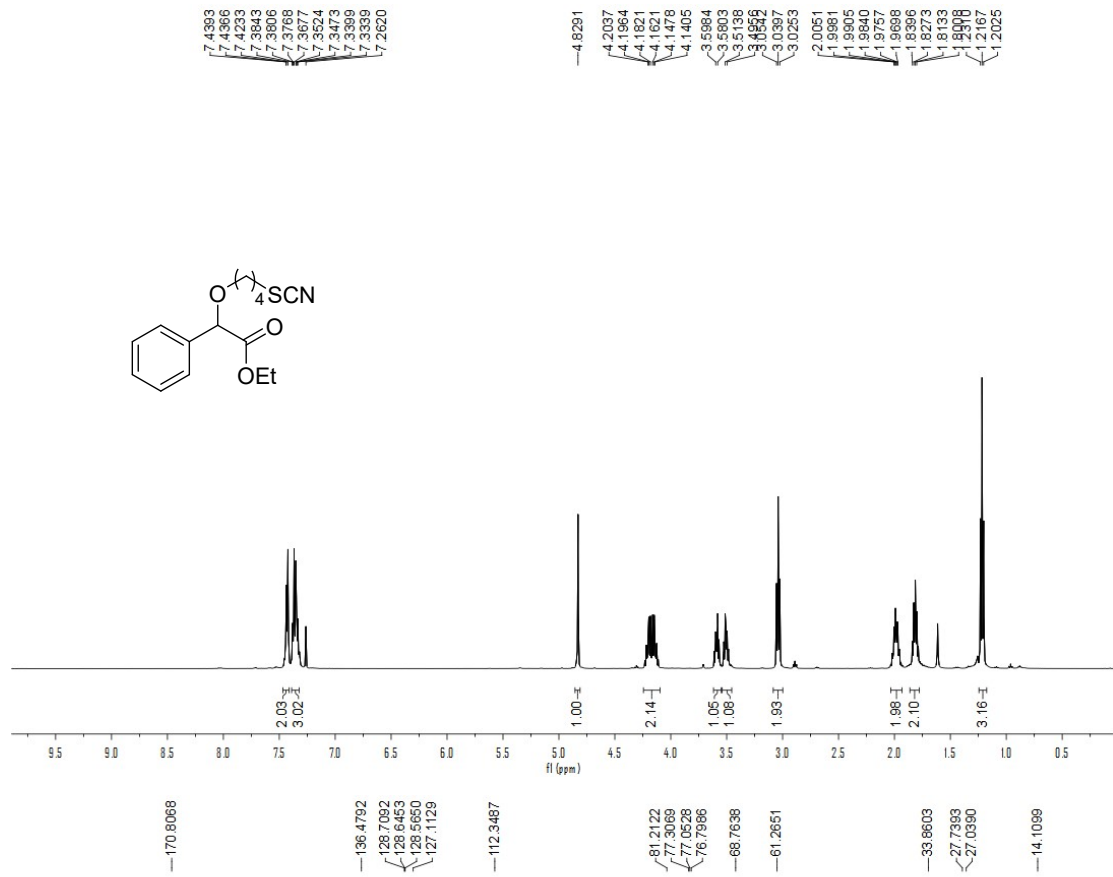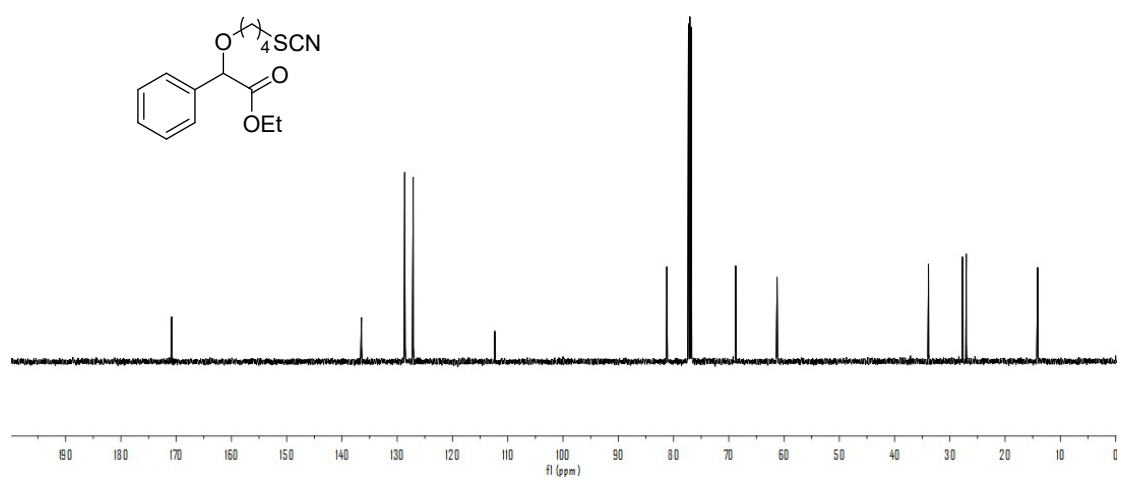

5p

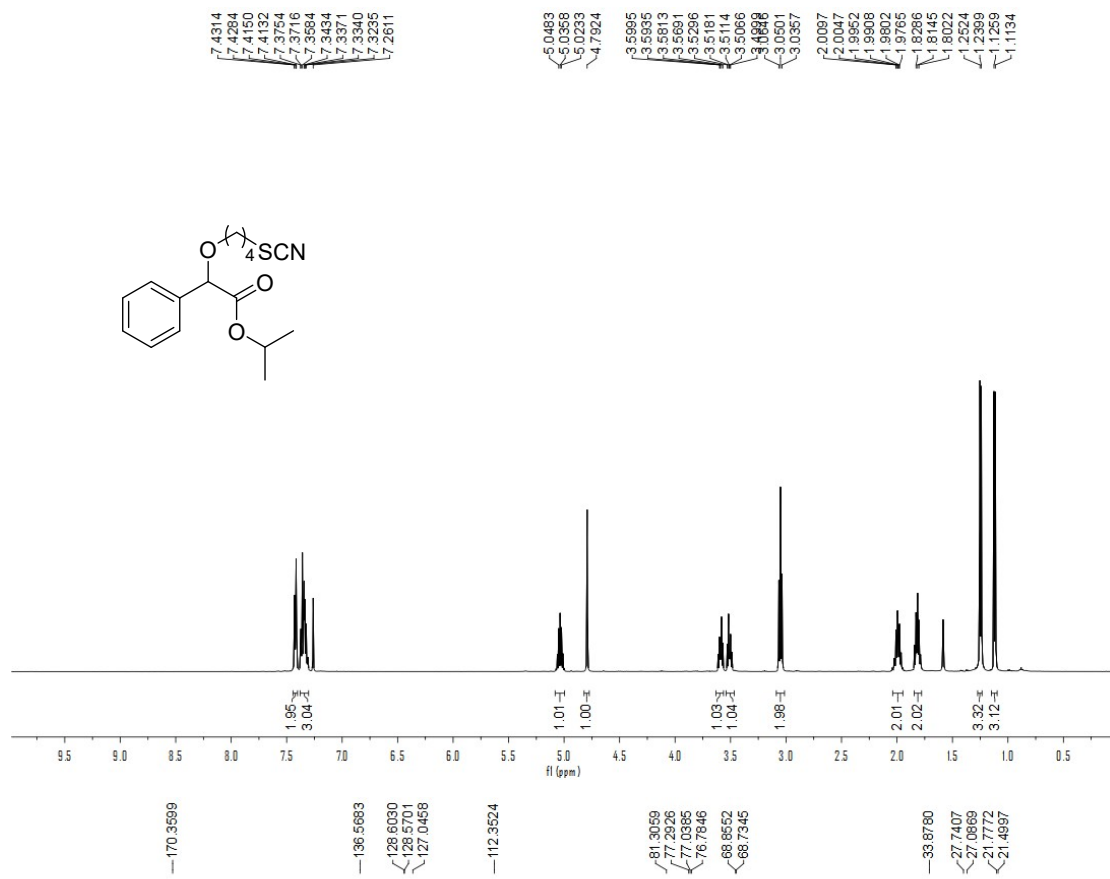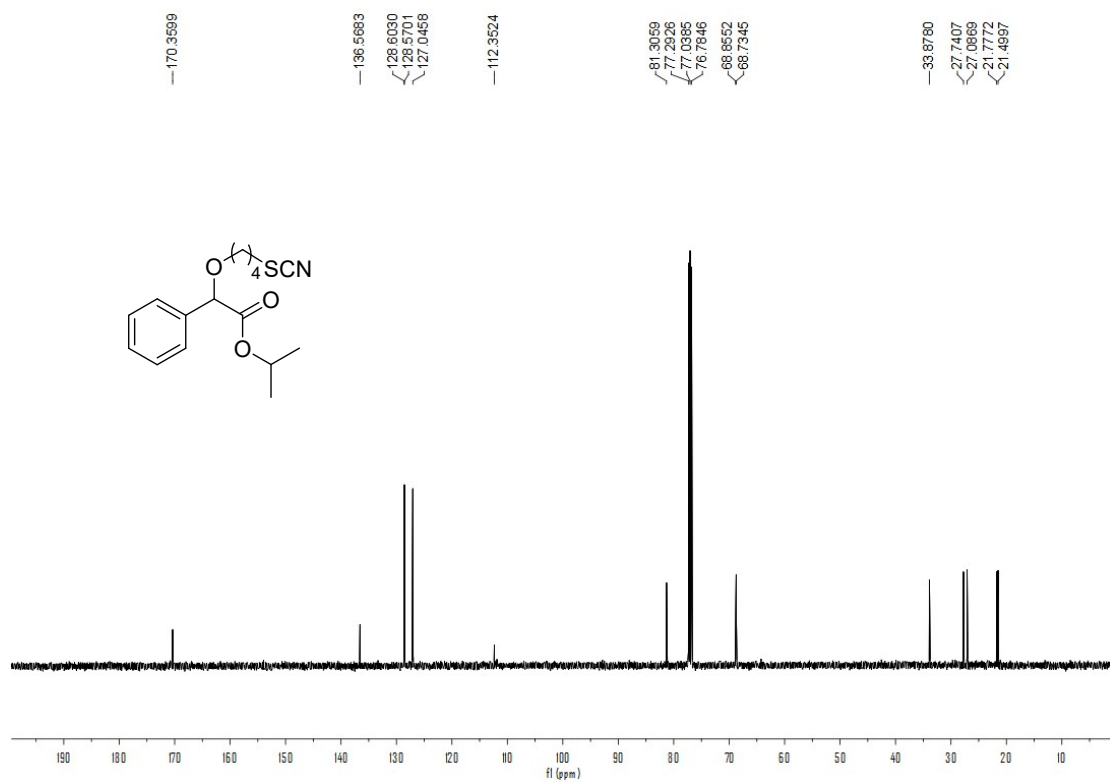

5q

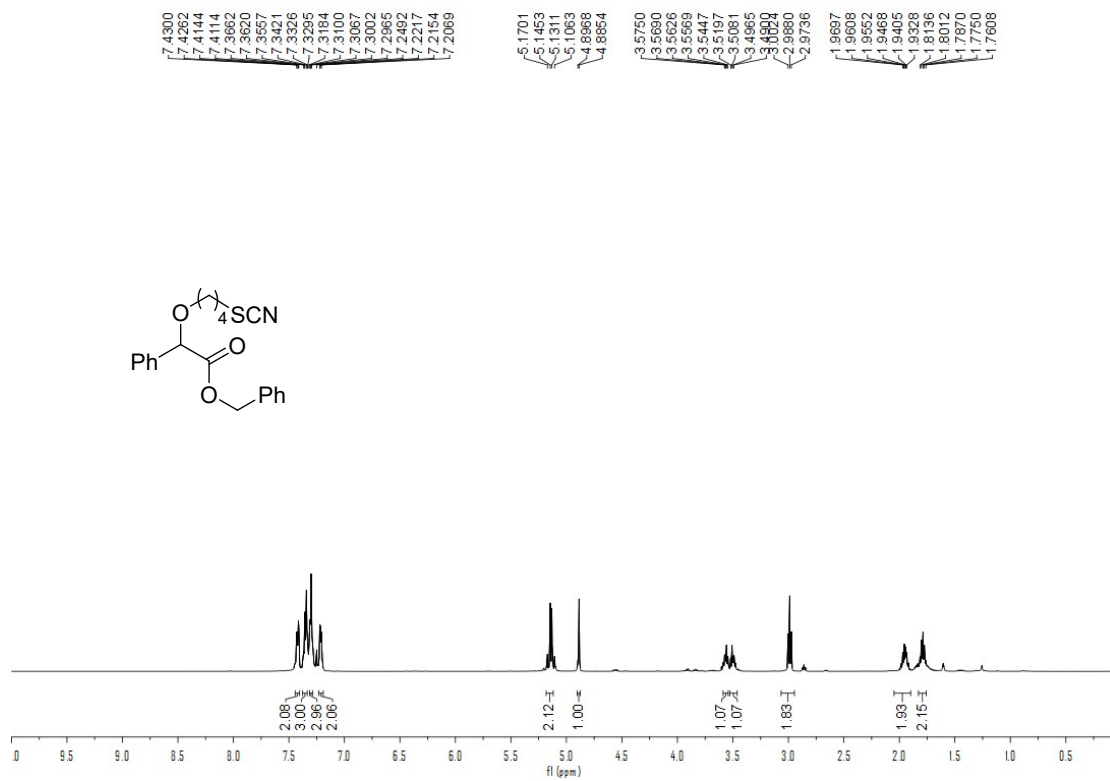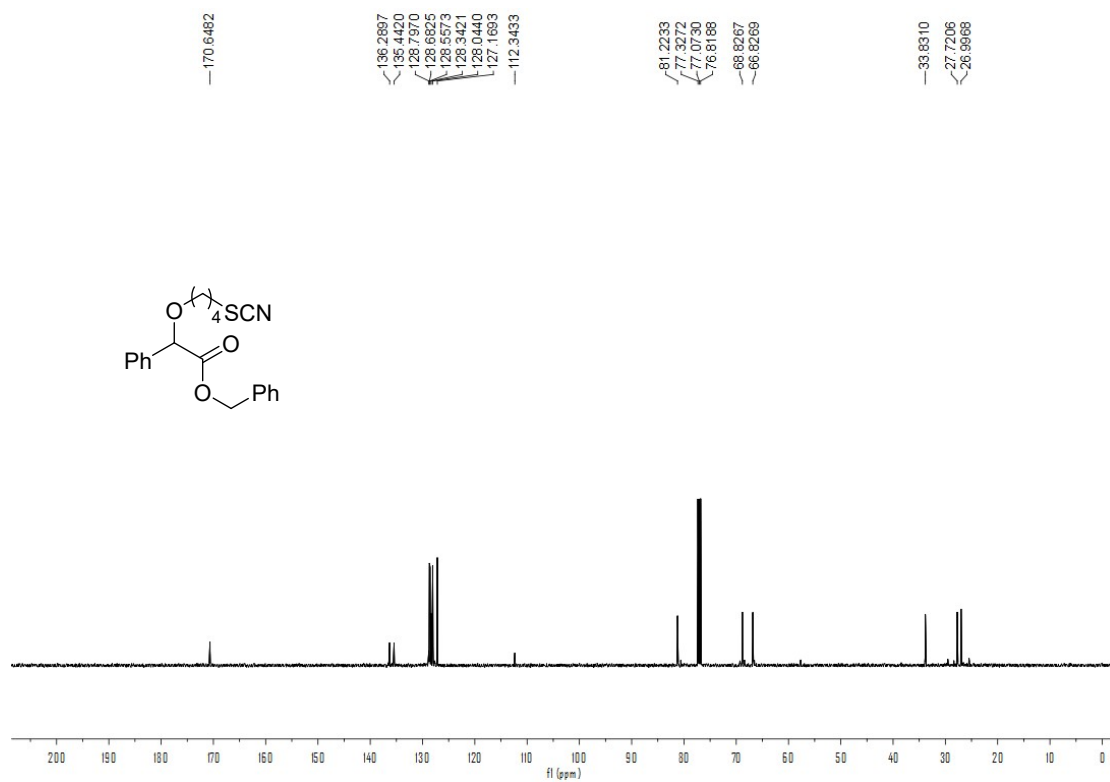

**5r**



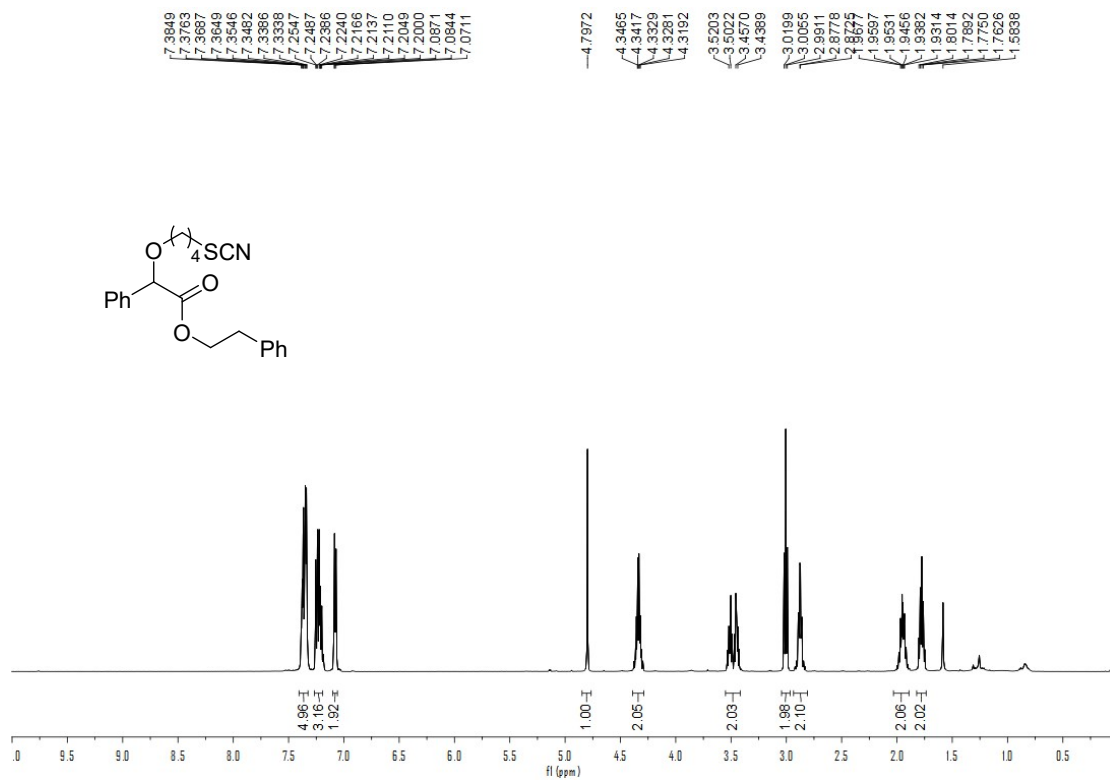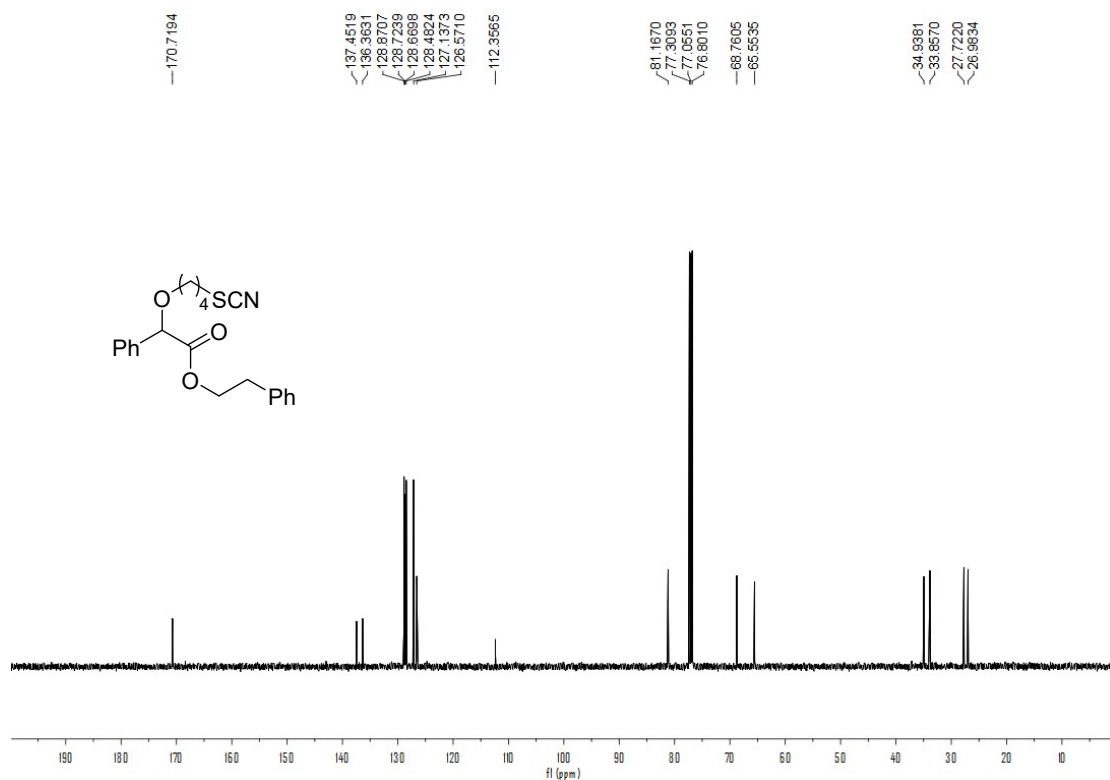

5s

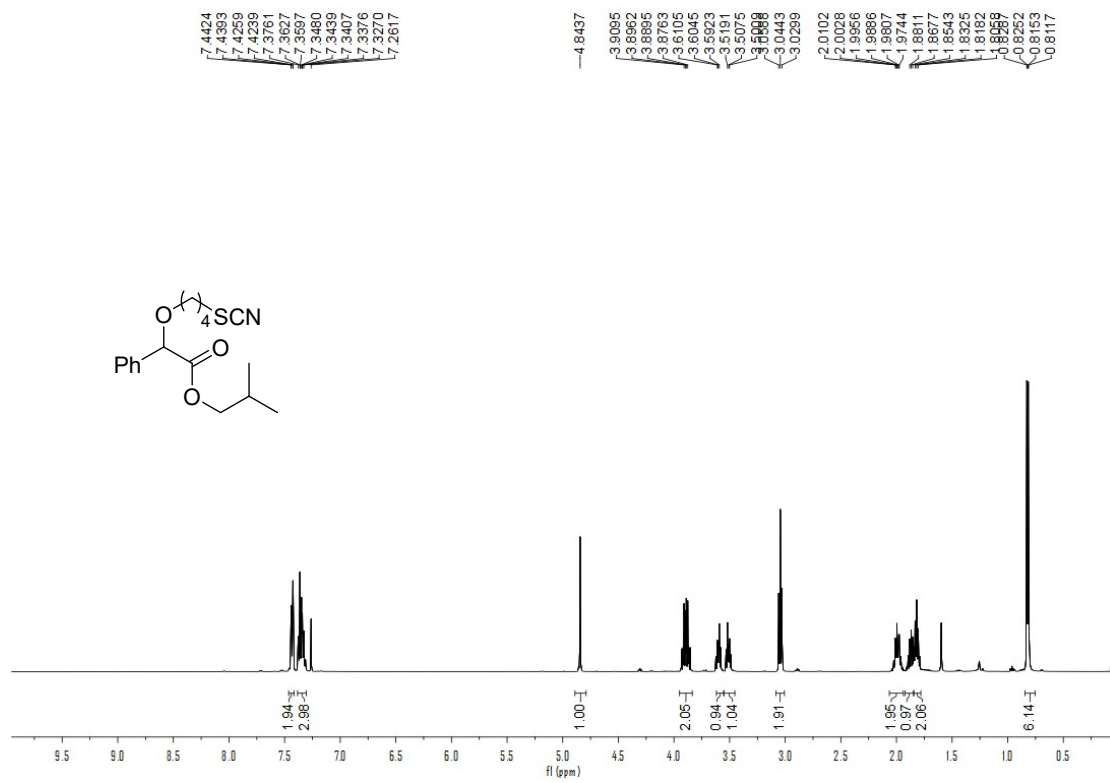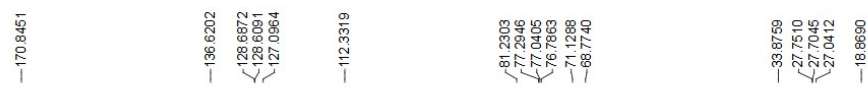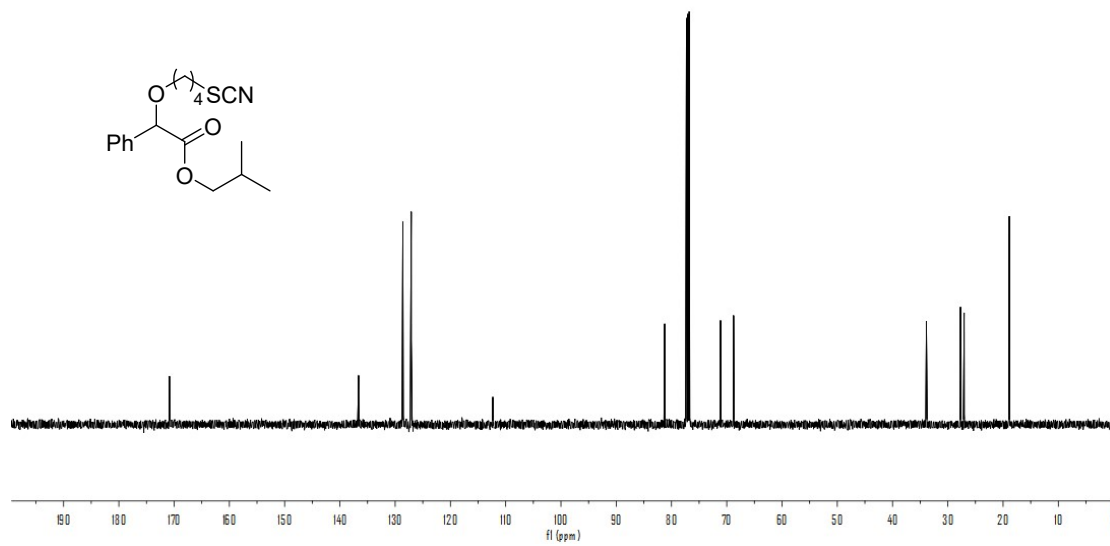

5t

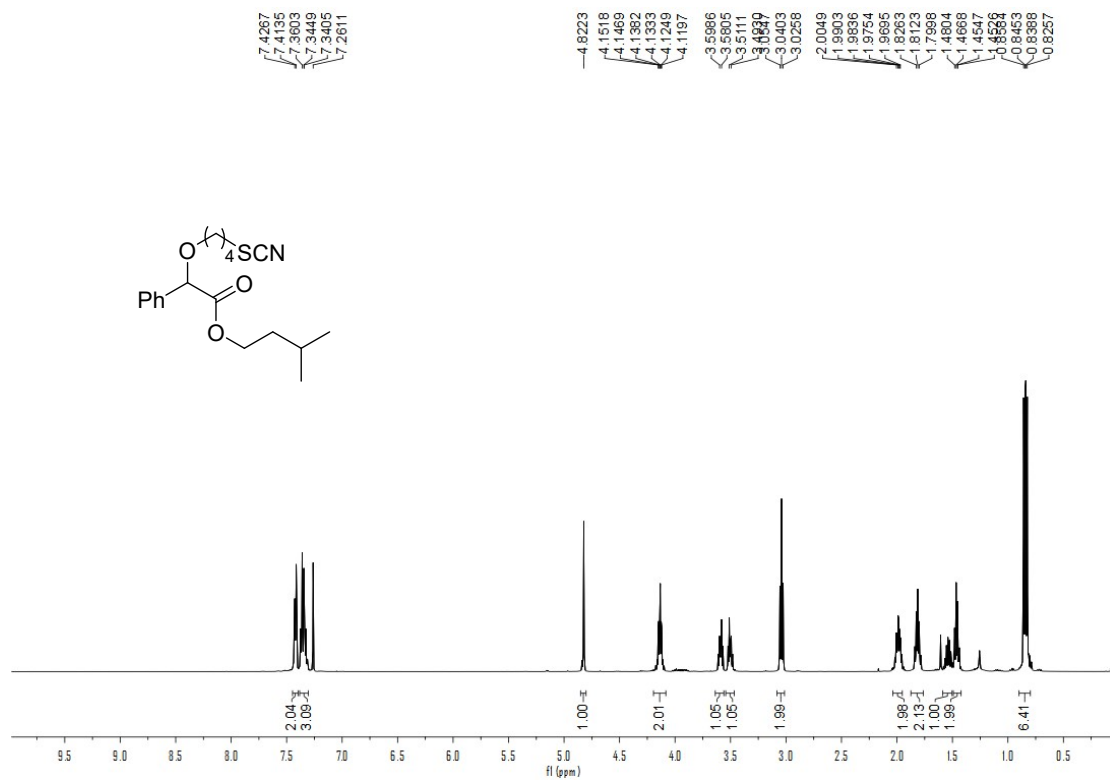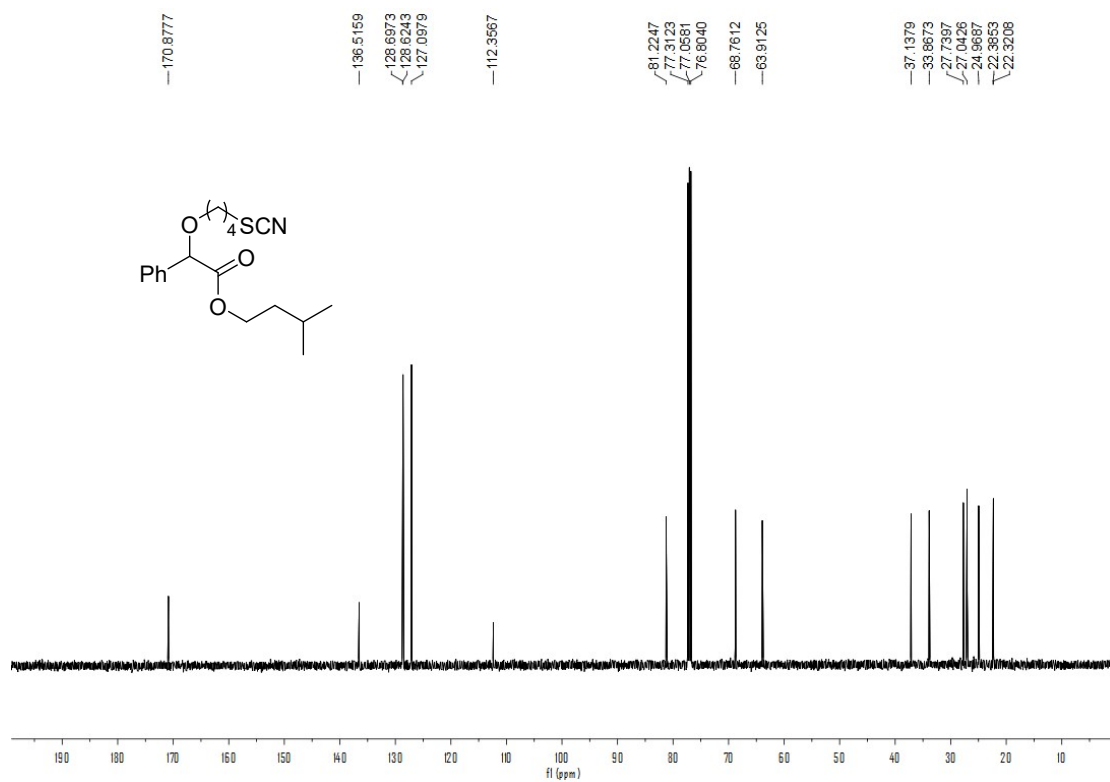

5u

7.4469  
7.4435  
7.4306  
7.4282  
7.3702  
7.3672  
7.3549  
7.3506  
7.3474  
7.3374  
7.2805  
5.8671  
5.8571  
5.8460  
5.8329  
5.8229  
5.8118  
5.8005  
5.1934  
5.1749  
5.1723  
4.8698  
4.6179  
4.6103  
4.6072  
4.6037  
4.5894  
3.6047  
3.5988  
3.5866  
3.5213  
3.5098  
3.0197  
3.0347  
3.0203  
2.0045  
1.9961  
1.9899  
1.9821  
1.9751  
1.9679  
1.9536  
1.8395  
1.8275  
1.8130  
1.8008

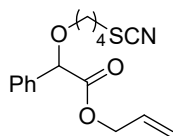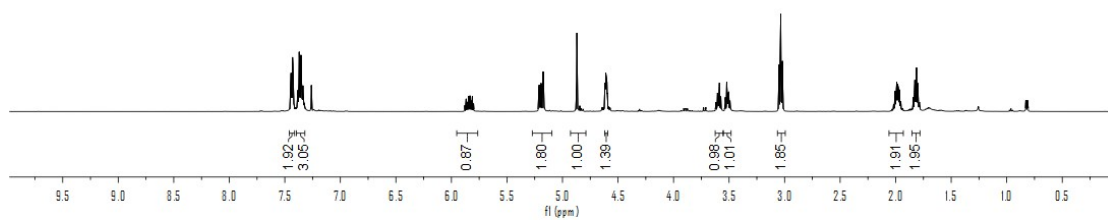

170.4561  
136.3524  
131.5524  
128.7944  
128.6808  
127.1514  
127.0989  
118.5488  
112.3285  
81.1845  
77.3090  
77.0547  
76.8006  
68.8110  
65.6399  
33.8505  
27.7387  
27.0175

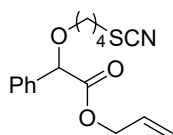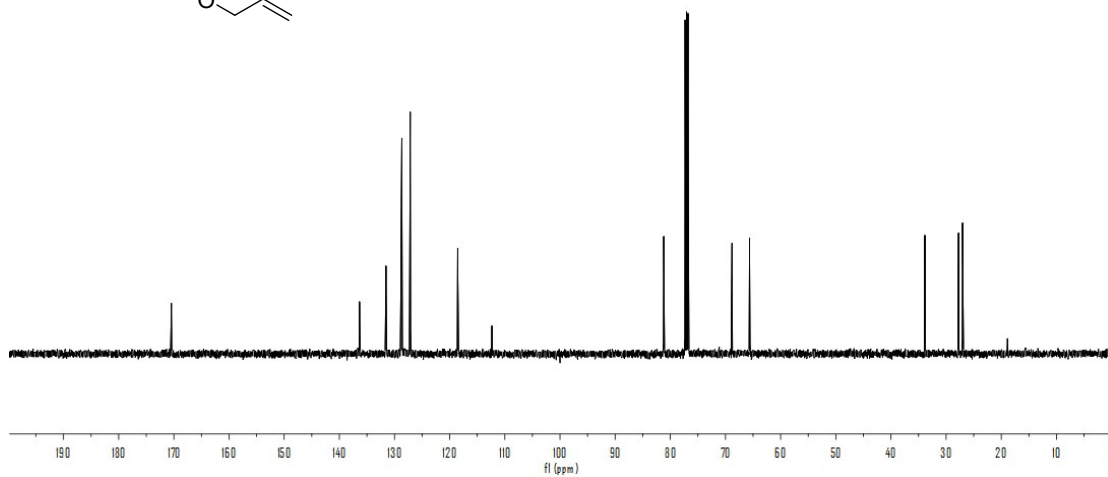

5v

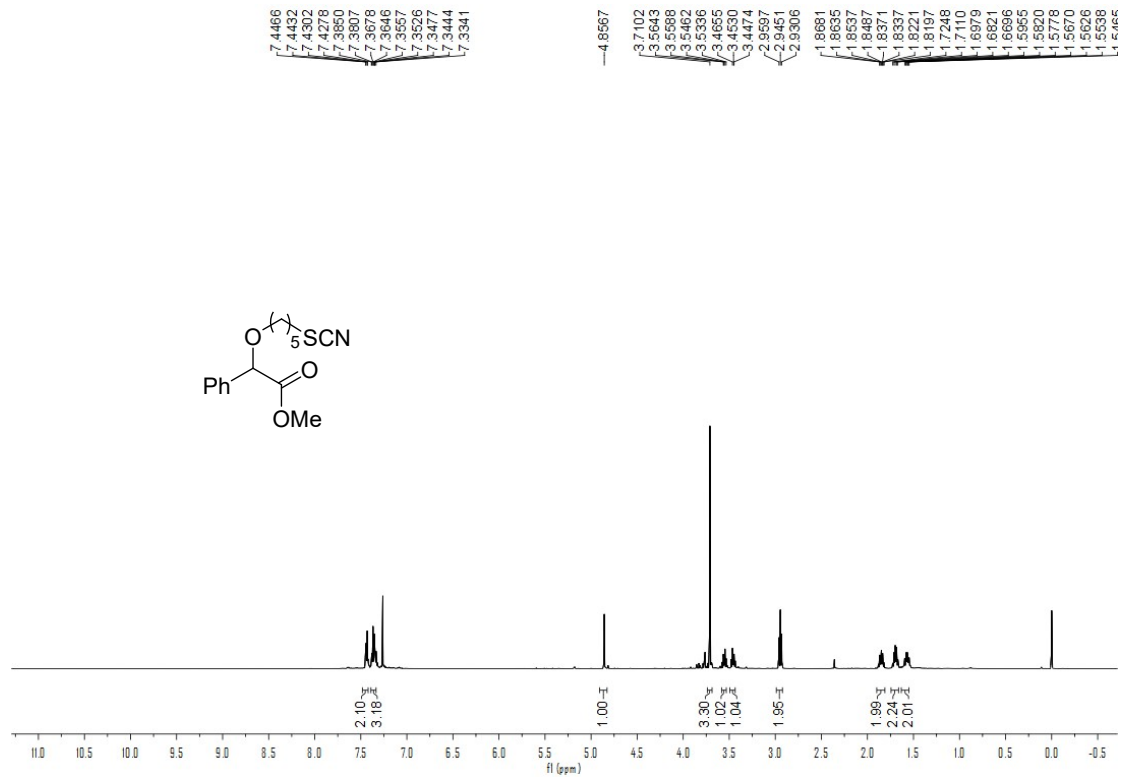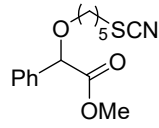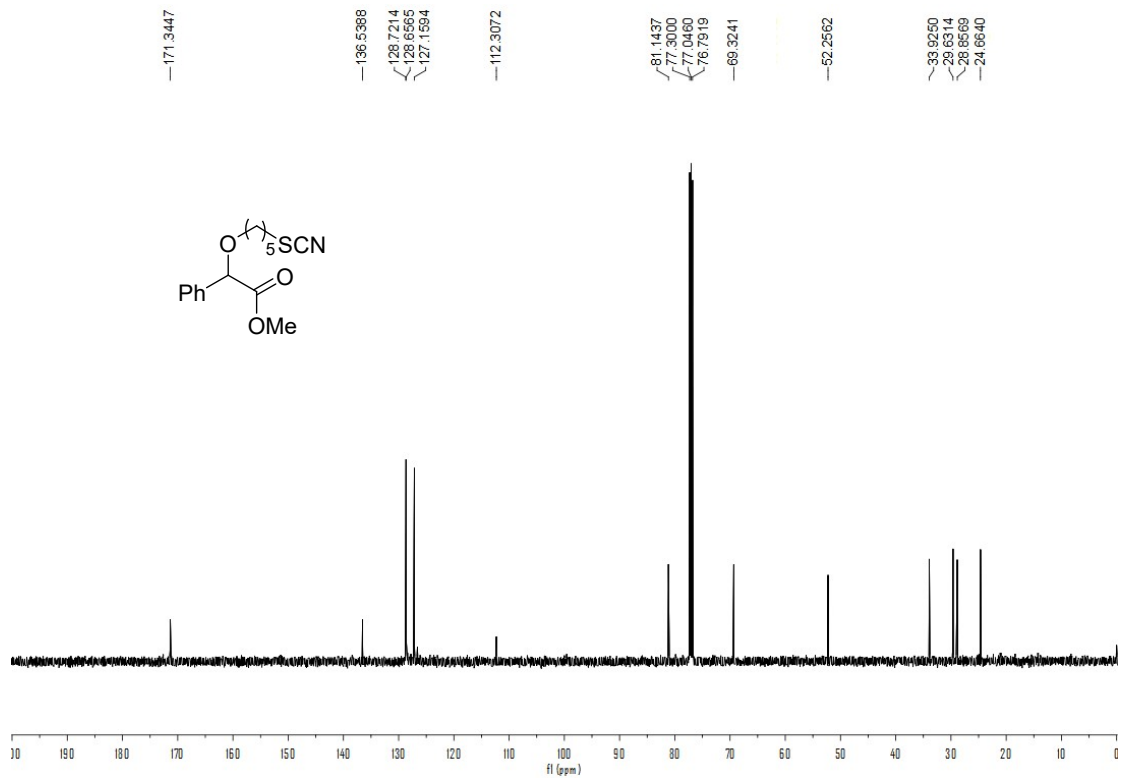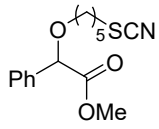

5w

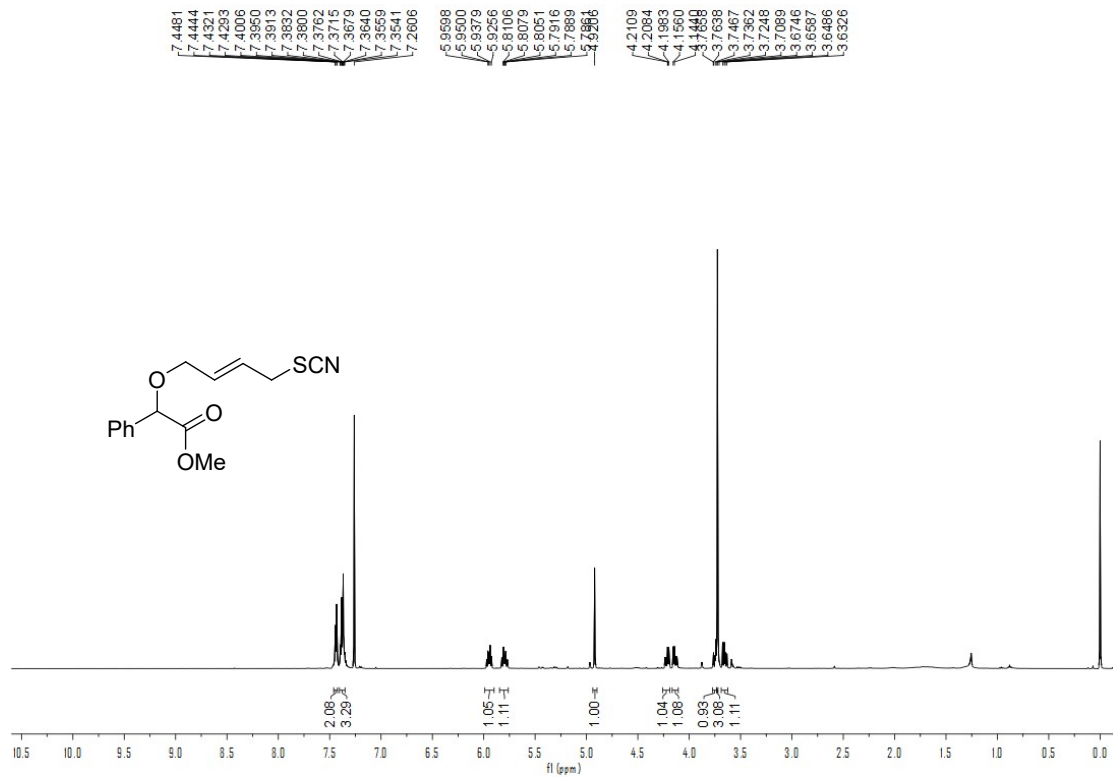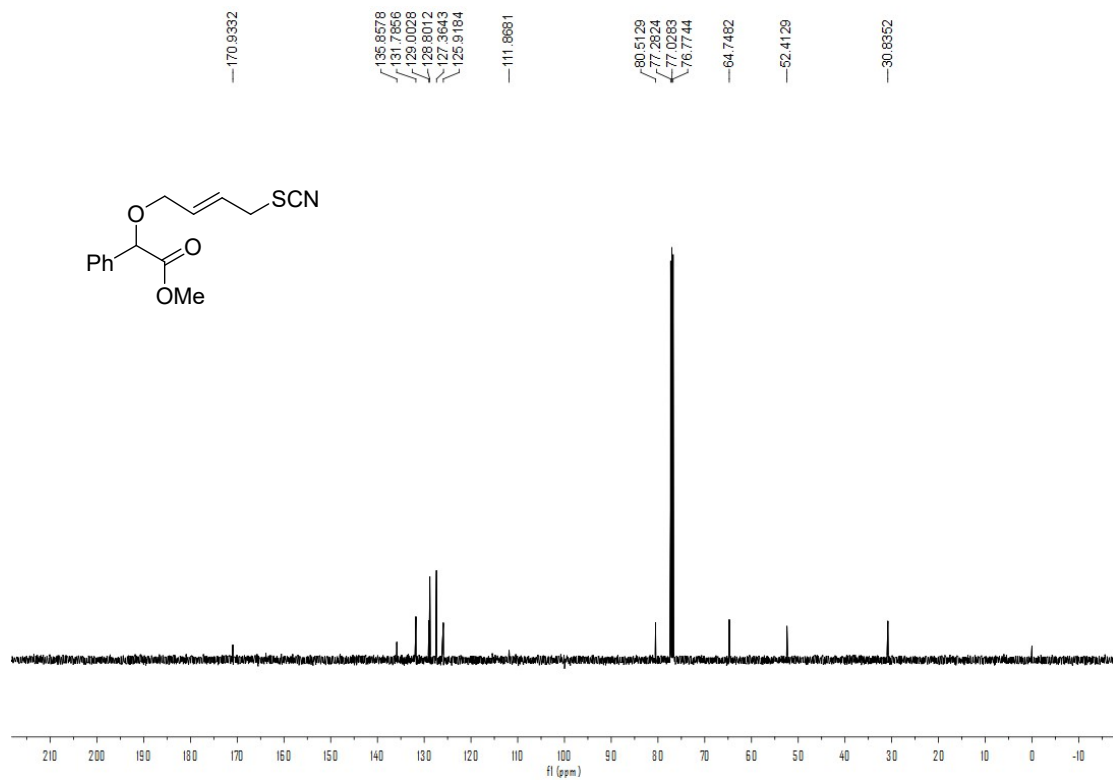

5x

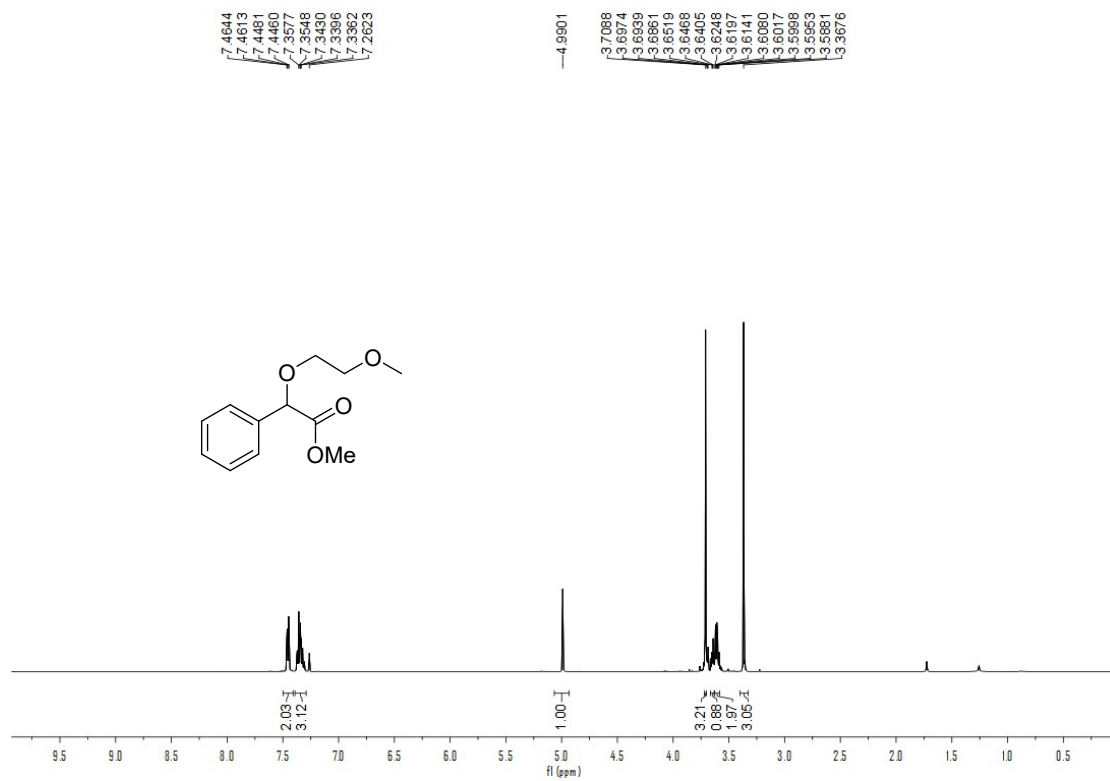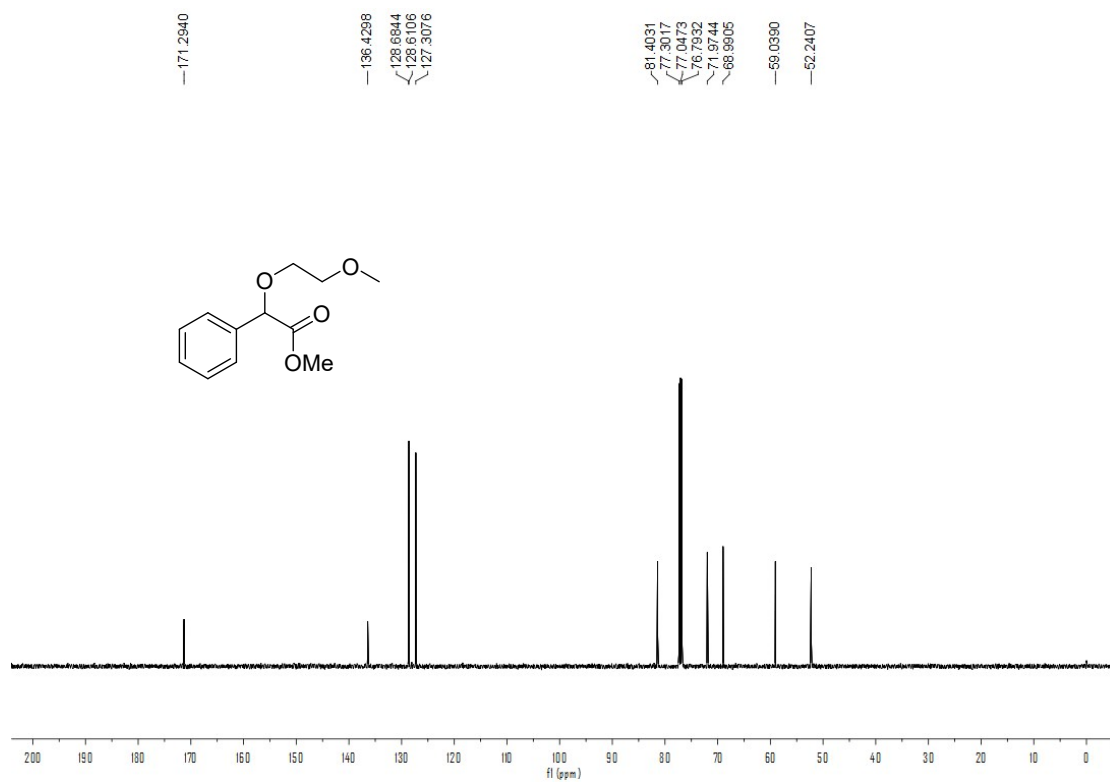

6a

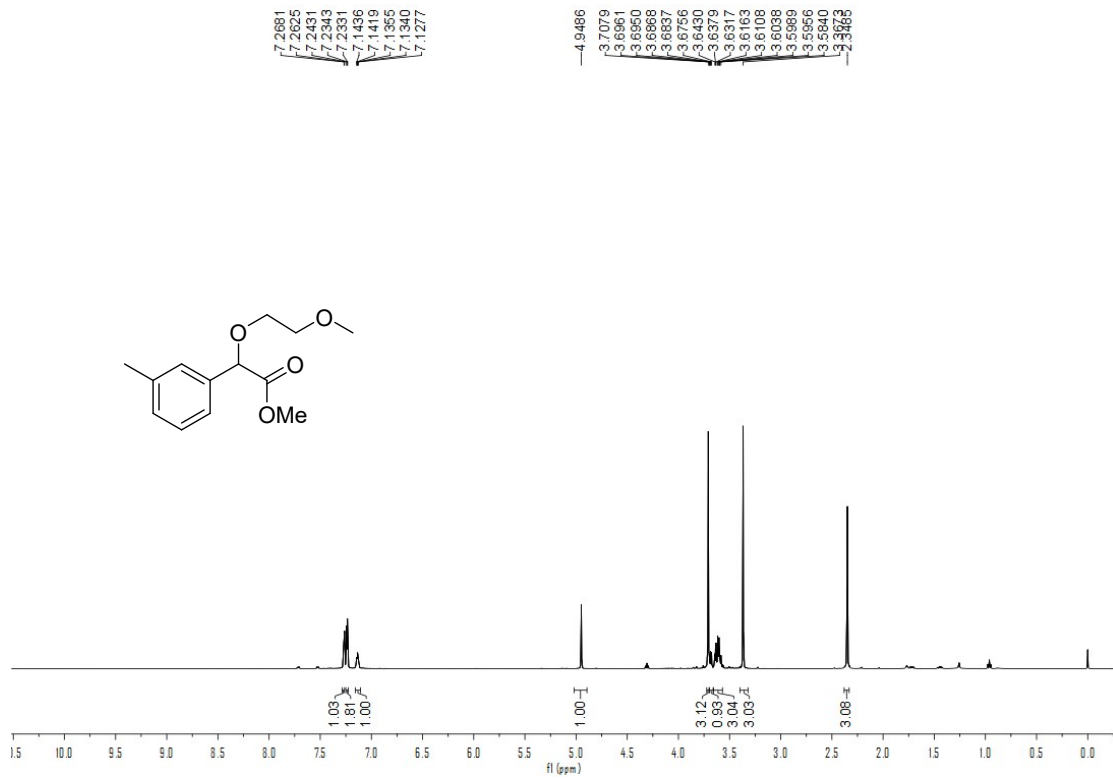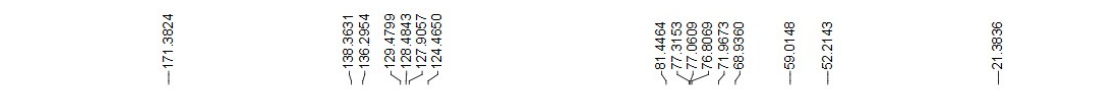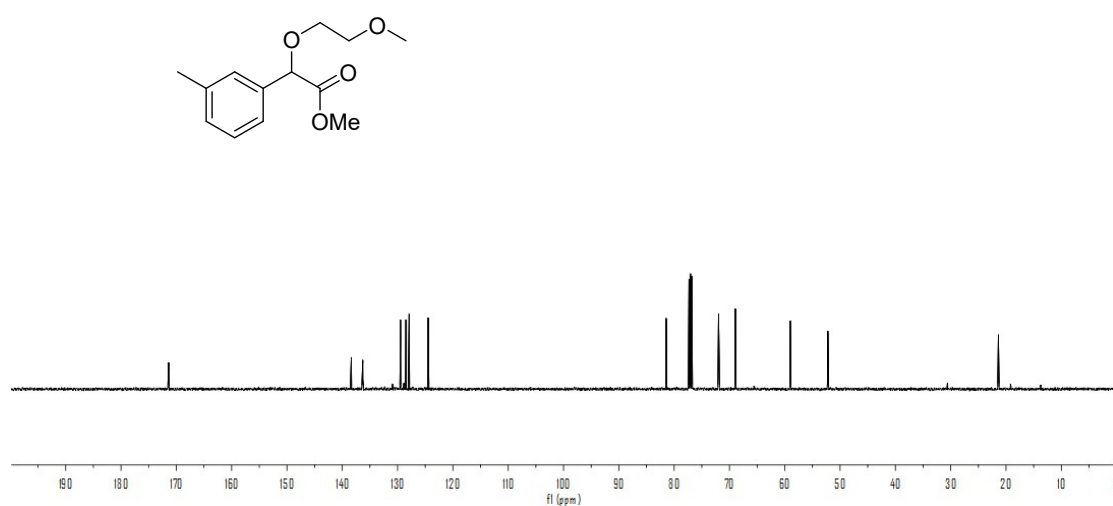

6b



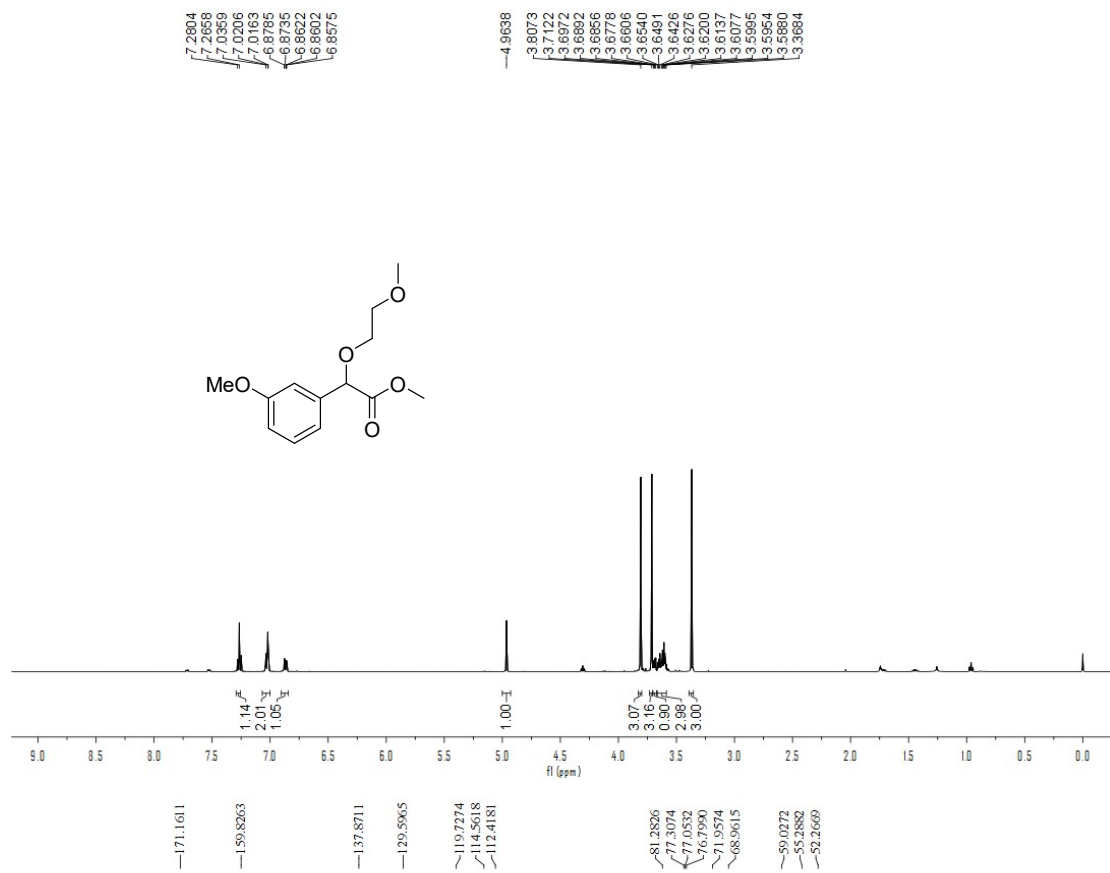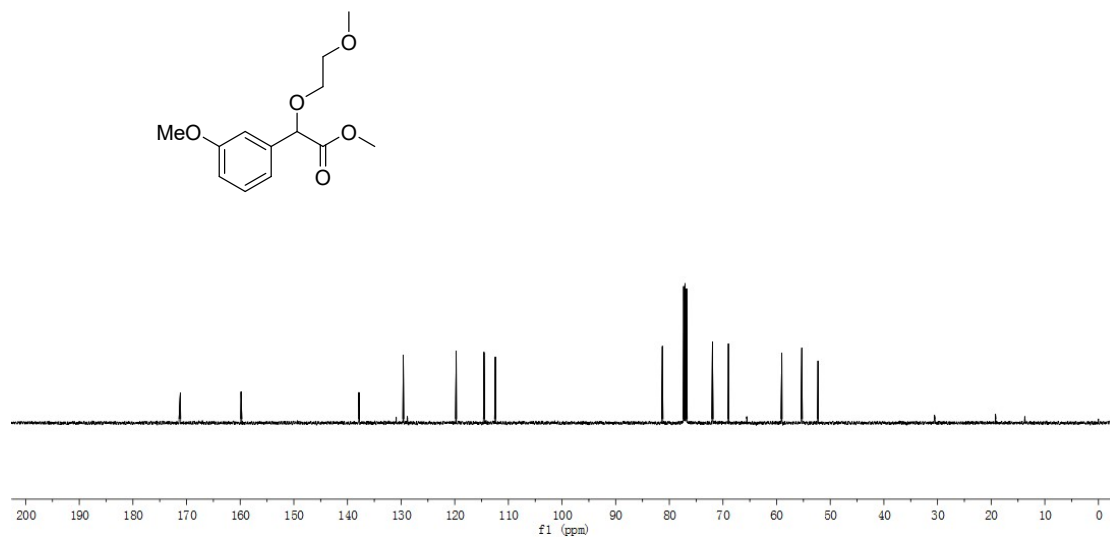

6c

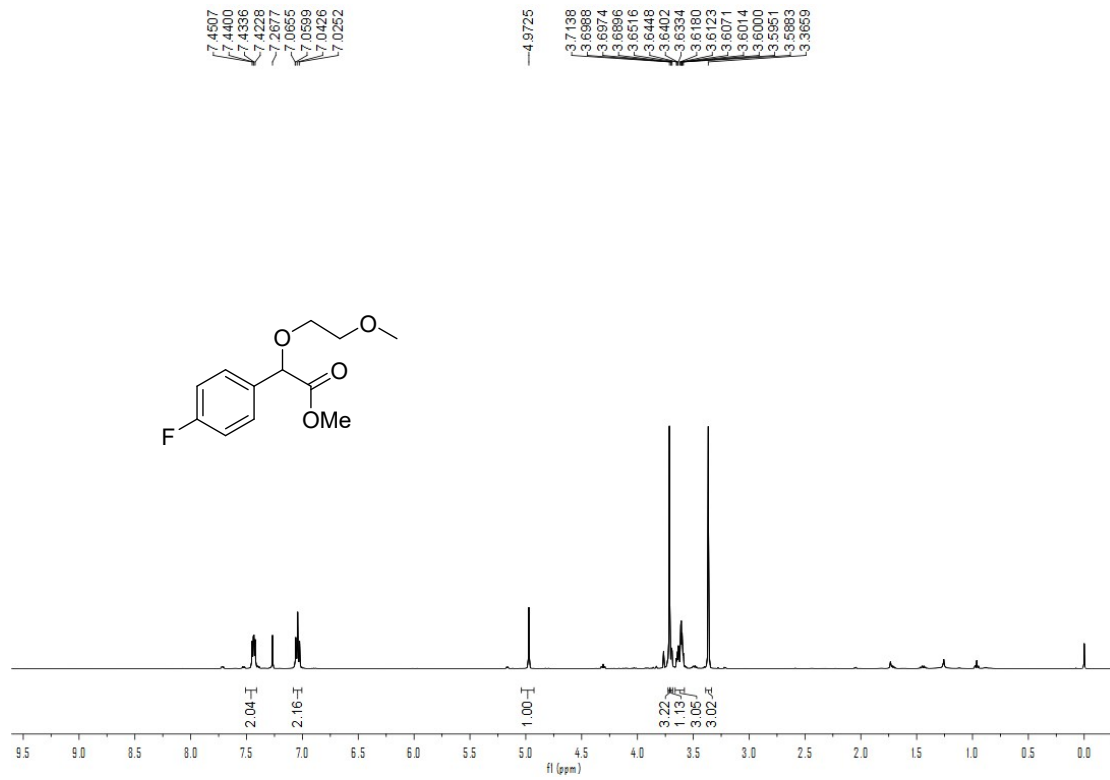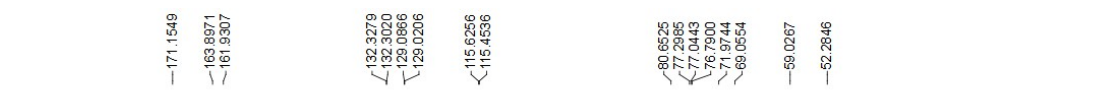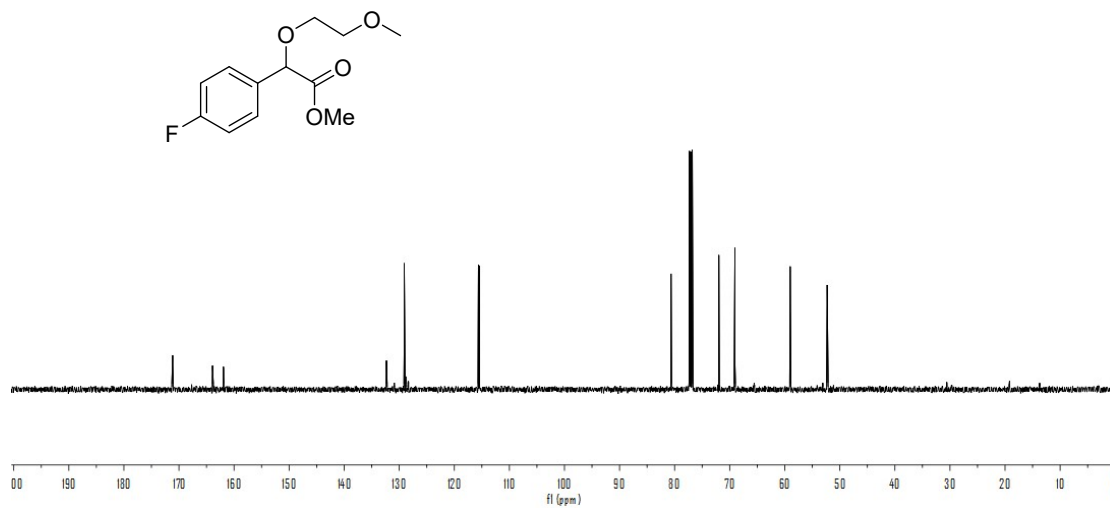

6d

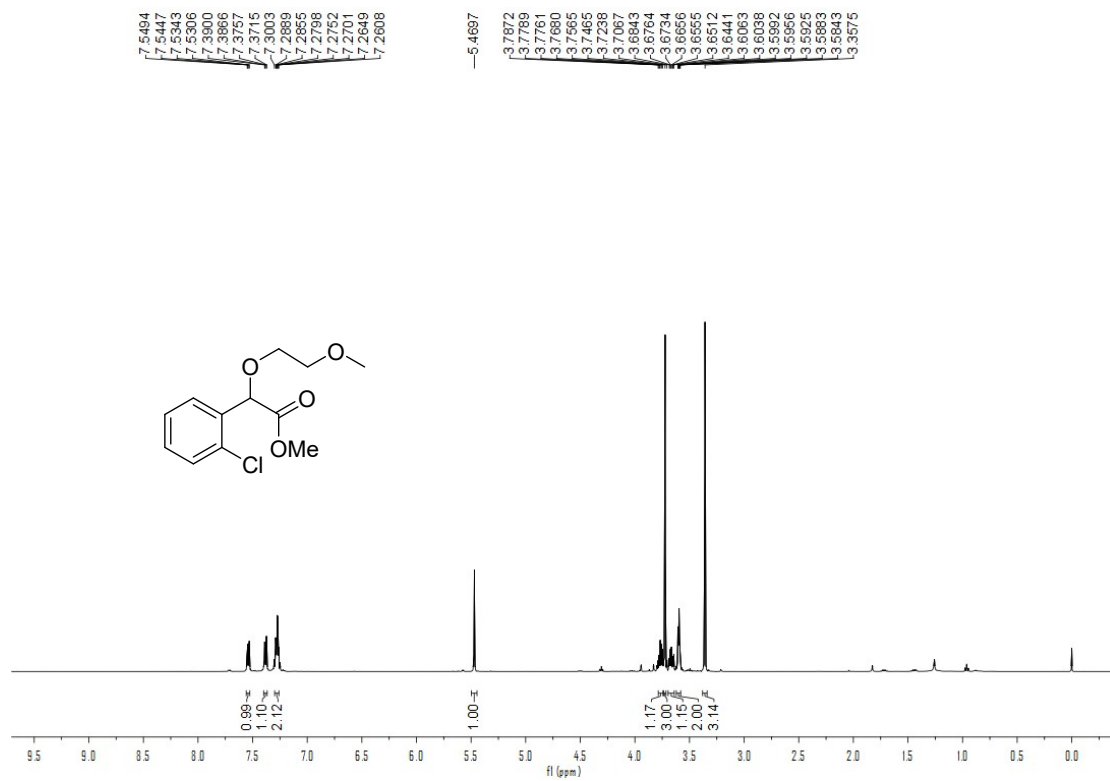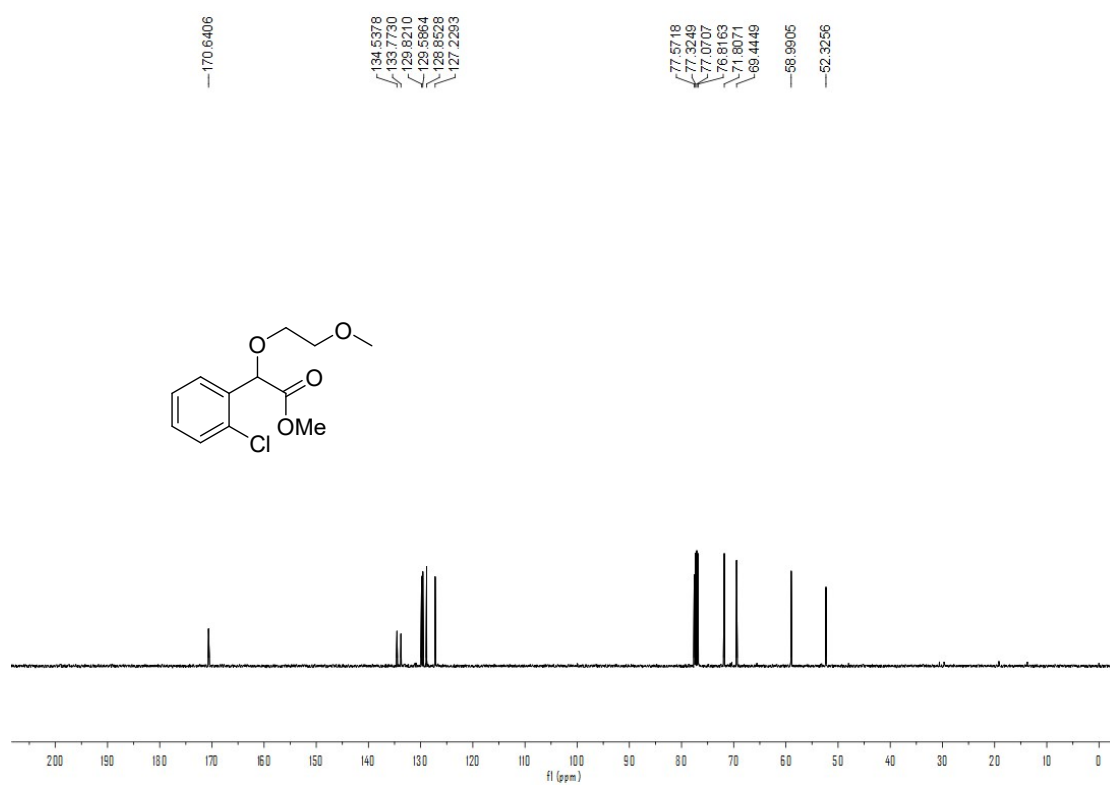

6e
